1                    **Differential plasmacytoid dendritic cell phenotype and type I Interferon**  
2                    **response in asymptomatic and severe COVID-19 infection**

3  
4  
5 Martina Severa<sup>1†</sup>, Roberta A. Diotti<sup>2†</sup>, Marilena P. Etna<sup>1†</sup>, Fabiana Rizzo<sup>1</sup>, Stefano Fiore<sup>1</sup>, Daniela  
6 Ricci<sup>1</sup>, Marco Iannetta<sup>3</sup>, Alessandro Sinigaglia<sup>4</sup>, Alessandra Lodi<sup>3</sup>, Nicasio Mancini<sup>2</sup>, Elena  
7 Criscuolo<sup>2</sup>, Massimo Clementi<sup>2‡</sup>, Massimo Andreoni<sup>3</sup>, Stefano Balducci<sup>5</sup>, Luisa Barzon<sup>4</sup>, Paola  
8 Stefanelli<sup>1</sup>, Nicola Clementi<sup>2‡</sup>, Eliana M. Coccia<sup>1‡\*</sup>

9  
10  
11 <sup>1</sup> Department of Infectious Diseases, Istituto Superiore di Sanità (Rome, Italy)

12 <sup>2</sup> Laboratory of Medical Microbiology and Virology, Vita-Salute San Raffaele University (Milan,  
13 Italy)

14 <sup>3</sup> Infectious Disease Clinic, Policlinico Tor Vergata (Rome, Italy)

15 <sup>4</sup> Department of Molecular Medicine, University of Padova (Padua, Italy)

16 <sup>5</sup> Metabolic Fitness association (Monterotondo, Rome, Italy)

17  
18 <sup>†</sup> **the authors equally contributed to this work**

19 <sup>‡</sup> **shared senior co-authorship**

20 <sup>\*</sup> **Corresponding author:** Eliana M. Coccia, PhD; email address: [eliana.coccia@iss.it](mailto:eliana.coccia@iss.it)

21  
22  
23 **Short title**

24 Plasmacytoid dendritic cells and type I interferon in COVID-19

25 **Abstract**

26

27 SARS-CoV-2 fine-tunes the interferon (IFN)-induced antiviral responses, which play a key role in  
28 preventing coronavirus disease 2019 (COVID-19) progression. Indeed, critically ill patients show  
29 an impaired type I IFN response accompanied by elevated inflammatory cytokine and chemokine  
30 levels, responsible for cell and tissue damage and associated multi-organ failure.

31 Here, the early interaction between SARS-CoV-2 and immune cells was investigated by  
32 interrogating an *in vitro* human peripheral blood mononuclear cell (PBMC)-based experimental  
33 model. We found that, even in absence of a productive viral replication, the virus mediates a  
34 vigorous TLR7/8-dependent production of both type I and III IFNs and inflammatory cytokines and  
35 chemokines, known to contribute to the cytokine storm observed in COVID-19. Interestingly, we  
36 observed how virus-induced type I IFN secreted by PBMC enhances anti-viral response in infected  
37 lung epithelial cells, thus, inhibiting viral replication. This type I IFN was released by plasmacytoid  
38 dendritic cells (pDC) *via* an ACE-2-independent mechanism. Viral sensing regulates pDC  
39 phenotype by inducing cell surface expression of PD-L1 marker, a feature of type I IFN producing  
40 cells. Coherently to what observed *in vitro*, asymptomatic SARS-CoV-2 infected subjects displayed  
41 a similar pDC phenotype associated to a very high serum type I IFN level and induction of anti-  
42 viral IFN-stimulated genes in PBMC. Conversely, hospitalized patients with severe COVID-19  
43 display very low frequency of circulating pDC with an inflammatory phenotype and high levels of  
44 chemokines and pro-inflammatory cytokines in serum.

45 This study further shed light on the early events resulting from the interaction between SARS-CoV-  
46 2 and immune cells occurring *in vitro* and confirmed *ex vivo*. These observations can improve our  
47 understanding on the contribution of pDC/type I IFN axis in the regulation of the anti-viral state in  
48 asymptomatic and severe COVID-19 patients.

49

50

51 **Author summary**

52

53 SARS-CoV-2 pandemic has resulted in millions of infections and deaths worldwide, yet the role of  
54 host innate immune responses in COVID-19 pathogenesis remains only partially characterized.  
55 Innate immunity represents the first line of host defense against viruses. Upon viral recognition, the  
56 secretion of type I and III interferons (IFN) establishes the cellular state of viral resistance, and  
57 contributes to induce the specific adaptive immune responses. Moving from *in vitro* evidences on  
58 the protective role played by plasmacytoid dendritic cells (pDC)-released type I IFN in the early  
59 phase of SARS-CoV-2 infection, here we characterized *ex vivo* the pDC phenotype and the balance  
60 between anti-viral and pro-inflammatory cytokines of COVID-19 patients stratified according to  
61 disease severity. Our study confirms in COVID-19 the crucial and protective role of pDC/type I  
62 IFN axis, whose deeper understanding may contribute to the development of novel pharmacological  
63 strategies and/or host-directed therapies aimed at boosting pDC response since the early phases of  
64 SARS-CoV-2 infection.

65

66 **INTRODUCTION**

67 As of end of March, 2021, COVID-19 pandemic, caused by severe acute respiratory syndrome  
68 coronavirus 2 (SARS-CoV-2), has resulted in more than one hundred and twenty million cases and  
69 more than two million and six hundred deaths globally  
70 ([https://www.who.int/publications/m/item/weekly-epidemiological-update-on-covid-19---31march-](https://www.who.int/publications/m/item/weekly-epidemiological-update-on-covid-19---31march-2021)  
71 2021).

72 The vast majority of SARS-CoV-2 infected subjects are asymptomatic or experience mild to  
73 moderate disease, whereas 5 to 10% of them progress, unfortunately, to severe or critical disease,  
74 requiring mechanical ventilation and admission to intensive care unit (1, 2). Host characteristics,  
75 including age (immunosenescence) and comorbidities (hypertension, diabetes mellitus, lung and  
76 heart diseases) may influence the course of the disease (3). Severe pneumonia caused by SARS-  
77 CoV-2 is marked by immune system dysfunction and systemic hyperinflammation leading to acute  
78 respiratory distress syndrome, macrophage activation, hypercytokinemia and coagulopathy (4).

79 Interestingly, SARS-CoV-2 infection can be asymptomatic with a rate of presentation estimated to  
80 be at least around 17% of total cases (5). Understanding the immunological features of these  
81 subjects is challenging but is of key importance to comprehend early events controlling SARS-  
82 CoV-2 replication.

83 Progression and severity of SARS-CoV-2 infection are, indeed, strictly related to virus-triggered  
84 immune dysfunctions often associated to defects in type I Interferon (IFN) production, and to over-  
85 production of pro-inflammatory cytokines, strongly implicated in the resulting damage to the  
86 airways and to the organs (6). Therefore, disease severity is not only due to the virus direct damage  
87 but strongly depends on the host inflammatory response to the infection (6-8).

88 Notably, coronaviruses have evolved several strategies to inhibit IFN anti-viral action triggering  
89 many escaping strategies (9, 10). This feature is relevant for SARS-CoV-2, which replicates more  
90 efficiently than SARS-Co-V (11), but induces less release of type I, II and III IFNs (7, 12). Hence,  
91 different SARS-CoV-2-encoded proteins can limit type I IFN functions or pathways (13). In

92 particular, nsp13, nsp14, nsp15, ORF6, ORF8, ORF3b and nucleocapsid proteins act as competent  
93 suppressors of IFN- $\beta$ ; while nsp1, nsp12, nsp13, nsp15 and the M protein are also potent inhibitors  
94 of the MAVS pathway (14-16).

95 In this paper, we investigate the SARS-CoV-2-elicited innate immune response using a human  
96 PBMC-based *in vitro* experimental model. We evaluate the key role of plasmacytoid dendritic cells  
97 (pDC) in the induction of type I IFN response in this context. Also, we performed an in-depth  
98 analysis of pDC phenotype and IFN and cytokine levels in COVID-19 patients, stratified according  
99 to disease severity, to evaluate possible correlation with COVID-19 progression and subsequent  
100 life-threatening complications.

## 101 RESULTS

### 102 SARS-CoV-2 stimulation of human PBMC induces a TLR7/8-dependent cytokine and 103 chemokine production *in vitro*

104 To understand if cells of immune system can sense SARS-CoV-2 leading to activation of innate  
105 response, we stimulated human PBMC with a clinical SARS-CoV-2 isolate.

106 To monitor the virus kinetic after incubation with human PBMC, we first treated these cells with  
107 SARS-CoV-2 at different multiplicity of infection (MOI; 0.01, 0.02, 0.04 and 0.1). Viral titration in  
108 supernatants from PBMC cultures, performed at the inoculum check at time zero (T0), as well as at  
109 24 (T1) and 48 (T2) hours post viral infection, showed no viral replication (**Fig 1**), in spite of cell  
110 viability that was not altered (**S1 Table**). These results indicate that PBMC, which are indeed not  
111 natural target cells of SARS-CoV-2, are not permissive, at least *in vitro*, to infection.

112 Having in mind that SARS-CoV-2 infection of both upper and lower airways regulates type I and  
113 type III IFN responses (12), here we studied by real-time PCR the expression of these anti-viral  
114 cytokines in the mixed immune cell population of PBMC and found a dose-dependent induction of  
115 high levels of type I IFN- $\alpha$ s and IFN- $\beta$ , as well as type III IFN- $\lambda$ 1 transcripts, as compared to cells  
116 stimulated with the TLR7/8 ligand R848, used as positive control (**Fig 2A**). In line with these data,  
117 we found a strong release of IFN- $\alpha$ s in culture supernatants (**Fig 2B**) and a concomitant induction  
118 of Mx dynamin-like GTPase 1 (Mx1) expression (**Fig 2C**), one of the classical IFN-inducible genes  
119 representing the so-called anti-viral IFN-signature. Thus, in human PBMC SARS-CoV-2 was  
120 unable to interfere efficiently with the intracellular machinery responsible for anti-viral IFN release  
121 and induction of IFN signature. Moreover, the addition of a specific inhibitor of TLR7/8 signaling  
122 (I-TLR7/8) completely abolished SARS-CoV-2-induced type I IFN response in PBMC (**Fig 2**),  
123 suggesting that the viral RNA may be involved in induction of IFN production in this setting. The  
124 level of cytokines and gene expression was unchanged in mock-treated cultures (**Fig 2**). Also, in the  
125 same experimental setting we found a remarkable production of inflammatory cytokines such as IL-  
126 6, TNF- $\alpha$  and IL-1 $\beta$ , which are well-recognized players of the cytokine storm occurring in COVID-

127 19 patients (17), while IL-12p70 level was reduced in SARS-CoV-2-stimulated PBMC (**Fig 3A**).  
128 Importantly, the anti-inflammatory IL-10 factor was also induced but its level was inversely related  
129 to virus MOI. In particular, IL-10 heavily decreased at higher MOI where inflammatory cytokines  
130 were enhanced (**Fig 3A**). Therefore, as for IFNs, the production of pro-inflammatory cytokines is  
131 dependent on TLR7/8 signaling (**Fig 3A**).

132 The recruitment and coordination of specific subsets of leukocytes at the site of viral infection  
133 heavily relies on chemokine secretion. Thus, in supernatants of PBMC stimulated with increasing  
134 doses of SARS-CoV-2 we also tested the release of CXC motif chemokine ligand 10 (CXCL-10 or  
135 IFN- $\gamma$  inducible protein, IP-10), CXCL-9 (or monokine induced by IFN- $\gamma$ , MIG), C-C motif  
136 chemokine ligand 2 (CCL-2 or macrophage cationic peptide 1, MCP-1), CXCL-8 (or IL-8) and  
137 CCL-5 (or Rantes) (**Fig 3B**). Among the studied chemokines, CXCL-10, CXCL-9 and CCL-2  
138 showed the highest induction in a viral dose-dependent manner (**Fig 3B**). In addition, our data  
139 showed that CXCL-9 and CCL-2 production was, in particular, TLR7/8-dependent (**Fig 3B**). The  
140 release of analyzed cytokines and chemokines was further increased at 48 hours post infection  
141 indicating an incremental SARS-CoV-2-dependent stimulation in our PBMC-based culture setting  
142 at the tested MOI (0.04 and 0.1) (**S1A and S1B Fig**).

143 Most importantly, by comparing infectious and UV-inactivated SARS-CoV-2 we also demonstrated  
144 that the production of type I IFN and of the pro-inflammatory cytokines IL-6, TNF- $\alpha$  and IL-1 $\beta$   
145 (**Fig 4A**) as well as of the chemotactic factors CXCL-10, CXCL-9 and CCL-2 (**Fig 4B**) required  
146 infectious virus.

147

#### 148 **SARS-CoV-2-induced type I IFN secreted by human PBMC inhibits virus infection of Calu-3** 149 **cells**

150 Several studies have clearly shown that SARS-CoV-2 infection modulates the release of type I and  
151 III IFNs (7, 12, 18). In our study we observed that SARS-CoV-2 infection of the lung carcinoma  
152 epithelial cell line Calu-3 triggers IL-6 expression while was unable to induce Mx1 gene

153 expression, mirroring a strong reduction of type I IFN production and, thus, confirming what  
154 already observed (7, 12) (**Fig 5A**).

155 Importantly, we first demonstrated that treatment of Calu-3 cells with supernatants collected from  
156 SARS-CoV-2-stimulated human PBMC (sup PBMC\_CoV2) strongly induced the transcription of  
157 the IFN-inducible gene Mx1, differently to what observed in cultures treated with supernatant from  
158 not stimulated PBMC (sup PBMC\_ns) (**Fig 5A**).

159 To understand if type I IFN naturally released by infected PBMC can inhibit SARS-CoV-2  
160 replication, we infected Calu-3 cells conditioned with either sup PBMC\_ns or sup PBMC\_CoV2  
161 (**Fig 5B and 5C**). In our experimental setting, while addition of sup PBMC\_ns affected neither Mx1  
162 transcription nor SARS-CoV-2 replication, presence of sup PBMC\_CoV2 correlated to an enhanced  
163 ISG signature and combined inhibition of SARS-CoV-2 infection as revealed by viral titrations of  
164 supernatants from Calu-3 cells (**Fig 5B and 5C**).

165 Hence, PBMC-derived type I IFN may rescue SARS-CoV2-mediated block of anti-viral response,  
166 thus, limiting viral expansion.

167

### 168 **Human pDC produce high levels of type I IFN upon SARS-CoV-2 stimulation**

169 pDC are classified as the major type I IFN producing cells following viral infections by sensing  
170 viral RNAs *via* TLR7 (19). Given the TLR7/8-dependent release of the anti-viral cytokines detected  
171 in SARS-CoV-2-stimulated PBMC, we hypothesized that pDC could be the main cell type  
172 responsible for type I IFN production. In addition, we also tested the possibility that the TLR8-  
173 expressing resting CD14<sup>+</sup> monocytes would be involved.

174 Thus, pDC were purified from PBMC of healthy donors and stimulated for 24 hours with SARS-  
175 CoV-2 (0.1 MOI) (**Fig 6**). In pDC cultures a strong production of IFN- $\alpha$ s, comparable to what  
176 found in PBMC, was detected, and this was clearly dependent on TLR7 signaling since I-TLR7/8  
177 blocked release of this cytokine (**Fig 6A**). SARS-CoV-2 stimulation of pDC did not depend on  
178 ACE-2 mediated viral entry or on the transmembrane serine protease 2 (TMPRSS2), both not

179 expressed by these cells in baseline condition or after stimulation with IFN- $\alpha$ s and IFN- $\beta$  (**S2A**  
180 **Fig**). Conversely, this instead occurs in human airway epithelial cells (20) and in Calu-3 lung  
181 epithelial cell line (**S2A Fig**).

182 Interestingly, *in vitro* stimulation by SARS-CoV-2 of monocytes, which exclusively express ACE-2  
183 but not TMPRSS2 (**S2A Fig**), did not lead to IFN- $\alpha$  or IL-6 production as compared to R848  
184 treatment (**S2C Fig**), even if these cells can be efficiently infected by the virus (21).

185 The responsiveness of pDC, monocyte and Calu-3 to exogenous IFN- $\alpha$ s and IFN- $\beta$  was tested by  
186 evaluating the induction of Mx1 to verify the bona fide of ACE-2 and TMPRSS2 expression data  
187 (**S2B Fig**).

188 pDC undergo phenotypical diversification in response to viral infections or single stimuli through  
189 environmental plasticity (22). They can diversify into three stable populations: P1-pDC (PD-  
190 L1<sup>+</sup>CD80<sup>-</sup>) specialized for type I IFN production, P2-pDC (PD-L1<sup>+</sup>CD80<sup>+</sup>) displaying both innate  
191 and adaptive functions and P3-pDC (PD-L1<sup>-</sup>CD80<sup>+</sup>) specifically with adaptive functions (22). In  
192 our experimental setting we monitored pDC phenotype and found a clear-cut increase of the  
193 frequency of PD-L1<sup>+</sup> P1-pDC, in accordance with the detected high IFN- $\alpha$  release, upon SARS-  
194 CoV-2 stimulation (**Fig 6B**). In line with these data, SARS-CoV-2-treated total pDC and P1-pDC  
195 display a very high surface expression of PD-L1 (**Fig 6C**). In presence of the TLR-7/8 inhibitor, P1  
196 phenotype upon SARS-CoV-2 stimulation reverted into the more adaptive P2 and P3 populations,  
197 similarly to R848-treated cultures (**Fig 6B**), with a strong increase of the surface level of CD80 (**Fig**  
198 **6C**). Accordingly, along with the maturation process, exemplified by the induction of the co-  
199 stimulatory marker CD86 (**Fig 6C**), SARS-CoV-2-treated pDC turn from type I IFN- into TNF- $\alpha$ -  
200 and IL-6-producing cells in the presence of the TLR-7/8 inhibitor (**Fig 6D**).

201

## 202 **pDC of asymptomatic and hospitalized COVID-19 subjects display a different phenotype**

203 Having defined the key role of pDC in the induction of a type I IFN-mediated anti-viral state in  
204 SARS-CoV-2-treated human PBMC, we then moved to study this cell type *ex vivo* in PBMC



205 collected from individuals with asymptomatic SARS-CoV-2 infection (CP-AS, n=8), in  
206 hospitalized COVID-19 patients (CP, n=6) and in a cohort of healthy donors matched for sex and  
207 age (HD, n=5) (see gating strategy in **S3A Fig** and patient characteristics in **S2 and S3 Tables**).

208 We first monitored whether the degree of COVID-19 severity would match to a differential level of  
209 circulating pDC and found a striking difference in the three analyzed groups (**Fig 7A**). The  
210 frequency as well as the absolute number of pDC were reduced in asymptomatic SARS-CoV2  
211 infected subjects as compared to HD (**Fig 7A**). According to the observed lymphopenia (**S2 Table**),  
212 symptomatic hospitalized patients had a very and consistently low level/depletion of circulating  
213 pDC independently of their age and sex (**Fig 7A**).

214 Further analysis of pDC phenotype in these groups highlighted that CP-AS mainly display a PD-  
215 L1<sup>+</sup> P1 phenotype; while, on the contrary, in CP mainly PD-L1<sup>+</sup>CD80<sup>+</sup> P2-pDC were observed (**Fig**  
216 **7B and 7C**). These data were in accordance also to the surface level of both PD-L1 and CD80  
217 markers in pDC expressed in terms of mean fluorescence intensity (MFI) (**Fig 7D and S3B Fig**).  
218 Importantly, CD86, which was significantly expressed in CP pDC, was further enhanced in CP-AS  
219 indicating that asymptomatic infection with SARS-CoV-2 strongly activates pDC (**Fig 7D and S3B**  
220 **Fig**).

221 We then monitored the expression of CXCR3 and CXCR4 on pDC, responsible for their  
222 localization to infected peripheral tissues including skin and epithelia, as well as of CCR7 and  
223 CD62-L, a chemokine receptor and an integrin that promote pDC lymph node homing respectively  
224 (**Fig 7E and 7F**). SARS-CoV-2 natural infection significantly increased both frequency (**Fig 7E**)  
225 and surface expression (**Fig 7F and S3C Fig**) of all these chemotactic markers on pDC of COVID-  
226 19 patients independently of the degree of disease severity, as compared to the level found in  
227 circulating pDC of matched HD, indicating that these cells are committed to migrate to the sites of  
228 viral infection.

229

230 **Asymptomatic and hospitalized individuals with SARS-CoV-2 infection display a specular**  
231 **anti-viral and pro-inflammatory profile**

232 To investigate if the significant difference in number and activation status observed in pDC of  
233 asymptomatic and severe COVID-19 patients would mirror a different anti-viral state in these  
234 individuals, we analyzed in *ex vivo* PBMC derived from HD, CP-AS and CP the transcription of the  
235 classical ISG, Mx1, and found a striking difference in its expression level (**Fig 8A**). RNA from CP-  
236 AS PBMC displayed a very high level of this gene as compared to HD, while CP PBMC had a  
237 much lower expression, even if significantly higher than HD cells (**Fig 8A**). Interestingly and in  
238 accordance with these results, IFN- $\alpha$  level markedly raised in sera of CP-AS as compared to CP  
239 and HD (**Fig 8B**).

240 The pro-inflammatory cytokines IL-6, TNF- $\alpha$  and IL-1 $\beta$  (**Fig 8C**) together with the chemotactic  
241 factors CXCL-10, CCL-2 and CXCL-8 (**Fig 8D**) had a specular profile to that observed for IFN- $\alpha$ s.  
242 Indeed, they were all found more increased in sera of critical than in asymptomatic COVID-19  
243 subjects (**Fig 8C and 8D**). Interestingly, the serum level of IL-10, a regulatory cytokine with a  
244 strong anti-inflammatory potential also known to be induced by type I IFN, was significantly  
245 increased also in CP-AS (**Fig 8C**). Similarly, serum CXCL-10, whose transcription is mainly  
246 regulated by type II IFN- $\gamma$ -mediated signaling but in part also by type I IFNs, was enhanced not  
247 only in CP but partly also in CP-AS (**Fig 8D**).

248

249 **DISCUSSION**

250 Early phases of anti-viral responses mainly consist of two interconnected pathways: first, the  
251 engagement of cellular anti-viral defenses, which are mediated by the transcriptional induction of  
252 type I and III IFNs with subsequent up-regulation of ISGs (23) and, second, the recruitment and  
253 coordination of specific subset of leukocytes primarily arranged by chemokine secretion (24). In a  
254 variety of infection models, including *in vitro* infection of permissive lung epithelium cell lines and  
255 primary bronchial epithelial cells as well as *ex vivo* samples derived from COVID-19 patients and  
256 animals, it was shown that, despite viral replication, a waning host immune response was induced  
257 with an altered induction of type I and III IFNs associated with a high release of chemokines (12,  
258 25). Accordingly, *in vivo* data from severely ill SARS-CoV-2-infected patients confirmed an  
259 impaired type I IFN response accompanied by elevated pro-inflammatory cytokine levels in sera (7,  
260 12), thus identifying exacerbated and abnormal responses in the innate branch of the immune  
261 system as a main driver of major illness (25).

262 In the present study, we interrogated human PBMC, a mixture of highly specialized immune cells,  
263 to understand their contribution to COVID-19 immunopathogenesis and the dynamic interaction  
264 between immune system and SARS-CoV-2 virus. We showed that human PBMC, even if not  
265 allowing a productive viral replication, respond to stimulation with a SARS-CoV-2 clinical isolate  
266 by expressing high levels of type I and III IFNs and a concomitant ISG transcription, as well as of  
267 the inflammatory cytokines IL-6, TNF- $\alpha$  and IL-1 $\beta$ .

268 It is well known that lymphopenia, together with neutrophilia and monocytopenia, is a characteristic  
269 of patients with severe COVID-19 (26). Consistently with these data, one of the main mechanisms  
270 associated with disease severity is the recruitment of inflammatory immune cells towards infected  
271 lungs and the subsequent hyperinflammatory state or the so-called cytokine releasing syndrome,  
272 which includes inflammatory mediators as well as chemokines (6, 27). A dramatic induction of  
273 chemotactic factors was found in *post-mortem* lung samples and in plasma or sera of COVID-19  
274 patients at different stages of disease (28). In particular, levels of CXCL-10, involved in the

275 etiology of various pulmonary conditions and attracting monocytes, NK and CXCR3-expressing  
276 Th1 cells (29, 30), increased with disease severity, suggesting that it may help in early diagnosis  
277 and could serve as a potential predictive marker of disease outcome (27). Also, the monocyte  
278 chemoattractant molecule CCL-2, was found upregulated during the early phase of infection,  
279 further increased during late stages of fatal disease (31) and associated with a prolonged duration of  
280 intensive care unit stay (32, 33). Patients with fatal COVID-19 also showed significantly higher  
281 plasma levels of the neutrophil recruiting CXCL-8 (34) as well as of the T and NK cell-attracting  
282 CXCL-9 (35), as compared to severe and/or mild COVID-19 patients (12, 31). In our study, *in vitro*  
283 SARS-CoV-2 stimulation of PBMC recapitulates the *in vivo* scenario found in COVID-19 since we  
284 observed a strong release of the aforementioned chemokines emerged as crucial in COVID-19  
285 pathogenesis.

286 Further, we proved that SARS-CoV-2-mediated release of inflammatory cytokines and chemokines  
287 heavily relies on the TLR-7/8 signaling and requires stimulation with infectious live SARS-CoV-2  
288 virions, consistently with recently published evidences of SARS-CoV2 partially productive  
289 infection of lymphomononuclear cell subsets (21, 36).

290 A characteristic of severe COVID-19 cases and of *in vitro* infected SARS-CoV-2 permissive  
291 respiratory epithelial cells is the highly impaired type I IFN release and response (with no IFN- $\beta$   
292 and low IFN- $\alpha$  production and activity detected), thus allowing and sustaining viral replication and  
293 an exacerbated inflammatory response (7, 12). With our experiment on permissive Calu-3 lung  
294 epithelial cells conditioned with culture supernatants of SARS-CoV-2-stimulated PBMC, we  
295 proved, for the first time, that PBMC-derived type I and III IFNs are bioactive and strongly  
296 enhanced ISG transcription with a concomitant anti-viral state in Calu-3 cells, differently to what  
297 found in the SARS-CoV-2 infected counterpart. Consistently with these data, SARS-CoV-2-  
298 stimulated PBMC supernatant partially inhibits SARS-CoV-2 replication in Calu-3 infected cells.  
299 Importantly, our results are fully coherent with previous data showing that *in vitro* administration of  
300 type I IFN- $\beta$  (37) and type III IFN- $\lambda$  (38) restrains and reduces SARS-CoV-2 viral replication.

301 Type I IFNs emerged as key protective factors in preventing COVID-19 disease severity. Genetical  
302 analyses of COVID-19 patients with life-threatening pneumonia had, indeed, reported inborn errors  
303 of type I IFN immunity and variants in genes encoding for RNA sensors and type I IFN regulating  
304 elements in absence of other risk factors (39, 40). Furthermore, more than 10% of COVID-19  
305 patients with severe pneumonia had neutralizing auto-antibodies against either type I IFN- $\omega$  or IFN-  
306  $\alpha$ s, or both, before disease onset and 94% of them were males; findings that might also explain the  
307 excess of men among the individuals with life-threatening COVID-19 disease (41). Moreover,  
308 severe COVID-19 patients uniquely produce antibodies that functionally block, through binding of  
309 the Fc domain to Fc $\gamma$ R-IIb, the production of type I IFN and ISG-expressing cells found in mild  
310 disease (25).

311 Having in mind all these evidences, we investigated which immune cell type is responsible for type  
312 I IFN release upon SARS-CoV-2 stimulation. pDC are known to be the principal cell type among  
313 immune cells specialized in type I IFN release sensing viral RNA in a TLR7-dependent manner  
314 (19). pDC can sense almost all viruses, including the coronaviruses SARS-CoV and Middle East  
315 respiratory syndrome coronavirus (MERS) (42-44), and were shown to recognize MERS *via* TLR7  
316 (44). In our study, pDC isolated from peripheral blood of healthy donors and stimulated *in vitro*  
317 with SARS-CoV-2 produced a high amount of TLR7-mediated IFN- $\alpha$ s, with a level comparable to  
318 that found in PBMC cultures, even if pDC do not express both the entry factors ACE-2 or  
319 TMPRSS2 [our data and (45)].

320 Further, our study showed that stimulation with SARS-CoV-2 regulated pDC phenotype and  
321 activation status. Hence, viral sensing mediates the cell surface up-regulation of PD-L1 on more of  
322 the 55% of cultured pDC, a phenotype found in pDC specialized in type I IFN production (22). In  
323 presence of a TLR-7/8 inhibitor SARS-CoV-2-treated pDC turn from PD-L1<sup>+</sup>CD80<sup>-</sup> to PD-  
324 L1<sup>+</sup>CD80<sup>+</sup> or CD80<sup>+</sup> only expressing cells, two subpopulations known to mediate adaptive  
325 functions and T cell interaction (22), as exemplified in our study also by the up-regulation of the  
326 costimulatory and maturation-associated marker CD86. Accordingly, pDC in presence of SARS-

327 CoV-2 and TLR7/8 inhibitor do not release type I IFNs and turn into TNF- $\alpha$ - and IL-6-producing  
328 cells. Production of the pro-inflammatory cytokine TNF- $\alpha$ , in particular, is known to negatively  
329 control in a autocrine/paracrine fashion the production of IFN- $\alpha$ s in pDC as soon as the maturation  
330 process starts (46). While we were finalizing this paper, Onodi and colleagues published similar  
331 results showing that SARS-CoV-2, in absence of productive infection, induces pDC phenotype  
332 diversification at a level similar to influenza virus (45). SARS-CoV-2-mediated type I IFN  
333 production was then blocked in pDC by hydroxychloroquine (45), in line to what we found in  
334 presence of a specific TLR7/8 inhibitor.

335 SARS-CoV-2 rapidly impairs T cell and DC responses during the acute phase of infection, which  
336 could have significant implications for COVID-19 pathogenesis (47). In particular, pDC have been  
337 extensively studied in patients with severe COVID-19 and were found significantly reduced or  
338 absent in the blood of these individuals (47-49). Importantly, while inflammatory monocytes and  
339 CD1c<sup>+</sup> conventional DC were present in lung infiltrates of patients with severe COVID-19,  
340 CD123<sup>hi</sup> pDC were depleted in blood but absent in the lungs (50).

341 While Onodi *et al.* demonstrated *in vitro* that pDC activation by SARS-CoV-2 is dependent on  
342 IRAK4- and UNC93B1-mediated signaling pathways by means of patients genetically deficient in  
343 genes encoding these factors (45), in this study we deepen the current understanding on pDC  
344 contribution and phenotype diversification in SARS-CoV-2 infection by characterizing *ex vivo*  
345 blood samples derived from patients at different COVID-19 disease severity. As expected, we  
346 observed a profound pDC depletion, in terms of both frequency and absolute numbers, in patients  
347 hospitalized with severe COVID-19 as compared to matched HD. Interestingly, then, in a cohort of  
348 asymptomatic SARS-CoV-2-infected individuals circulating pDC were already reduced in the  
349 peripheral blood as respect to the healthy counterpart but significantly higher than what found in  
350 hospitalized COVID-19 patients. Nonetheless, the phenotype was drastically different in pDC  
351 derived from severely infected or asymptomatic subjects. pDC from asymptomatic COVID-19  
352 mainly expressed PD-L1, while cells derived from severe COVID-19 were consistently represented

353 by PD-L1<sup>+</sup>CD80<sup>+</sup> phenotype. Importantly, the analysis of costimulatory marker CD86, that was  
354 significantly expressed in pDC from critically ill patients and further enhanced in cells of  
355 asymptomatic subjects, indicated that pDC are strongly activated during asymptomatic infection.

356 We also observed that the expression of chemokine receptors responsible for pDC localization to  
357 infected peripheral tissues, such as CXCR3 and CXCR4, or for their lymph node homing, as CCR7  
358 and CD62-L, was induced by SARS-CoV-2 natural infection both in terms of frequency and surface  
359 expression levels in cells of both asymptomatic or severe COVID-19 patients, possibly indicating  
360 that these cells are committed to migrate to the sites of viral infection independently of the degree  
361 of disease severity.

362 Hence, having found dramatic differences in phenotype of pDC from asymptomatic or severe  
363 COVID-19, we also tested if these data matched to the induced cytokine profile in the different  
364 disease courses. Most interestingly, PBMC isolated *ex vivo* from HD, asymptomatic or severely  
365 infected subjects indicated that anti-viral ISG expression is massively induced only in  
366 asymptomatic individuals. These data matched to the high amount of IFN- $\alpha$ s present in sera and  
367 with the PD-L1<sup>+</sup> P1 phenotype, specialized in type I IFN production, found in pDC of  
368 asymptomatic SARS-CoV-2 infected subjects. These results are in line with recent findings proving  
369 the high frequency of neutrophils and monocytes expressing high levels of ISG only in mild  
370 COVID-19, and not in the severe form (25). These ISG are likely up-regulated in these cell types in  
371 response to the high amount of circulating IFN- $\alpha$ s released by PD-L1<sup>+</sup> pDC.

372 Lastly, our study also demonstrated that a specular profile of anti-viral and inflammatory cytokines  
373 and chemokines exists between sera samples derived from asymptomatic or severe SARS-CoV-2  
374 infection. We found that severe COVID-19 patients displayed, as extensively already reported (35,  
375 51, 52), high level of circulating inflammatory cytokines, including IL-6, TNF- $\alpha$ , IL-1 $\beta$  and  
376 chemokines such as CXCL-10, CCL-2 and CXCL-8 contributing to the diffuse inflammatory status  
377 and the so-called cytokine storm. Conversely, we demonstrated that subjects with asymptomatic

378 infection have high level of IFN- $\alpha$ s and of the immune-regulatory IFN-inducible IL-10 known to  
379 dampen ongoing inflammatory responses.

380 In conclusion, in our study by using an *in vitro* human PBMC-based experimental model we  
381 recapitulated the *in vivo* scenario found in early SARS-CoV-2 infection and assessed the  
382 importance of pDC response and pDC-induced type I IFN in the regulation of the anti-viral state in  
383 asymptomatic and severe COVID-19 patients. Thus, the PBMC-based experimental setting might  
384 represent an optimal tool to study SARS-CoV-2-induced immune responses. Modulating innate  
385 antiviral immunity and, in particular, the pDC/type I IFN axis since the early phases of COVID-19  
386 may help to pinpoint novel pharmacological strategies or host-directed therapies that would  
387 counter-act the raising of hyper-inflammation and the resulting diffuse damage contributing to a  
388 rapid resolution of SARS-CoV-2 infection.

389



## 390 **MATERIALS AND METHODS**

### 391 **Patients**

392 Istituto Superiore di Sanità Review Board approved the use of blood from HD (AOO-ISS -  
393 14/06/2020 - 0020932) and from asymptomatic SARS-CoV2 infected individuals (IN\_COVID,  
394 AOO-ISS - 22/03/2021 - 0010979). Policlinico Tor Vergata approved blood withdrawal from  
395 hospitalized COVID-19 patients (COVID-SEET, CE#46.20, 18/04/2020).

396 In particular, for this study six hospitalized COVID-19 [CP; 2 females/4 males; median age  $\pm$   
397 Standard Deviation (SD)  $51.5 \pm 23.3$  yrs.] and eight asymptomatic [CP-AS; 4 females/4 males;  $58.5$   
398  $\pm 10.4$  yrs.] patients matched to five HD [2 females/3 males;  $53 \pm 12.5$  yrs.] were enrolled and  
399 provided written informed consent. Main demographic, clinical and experimental data related to  
400 asymptomatic and hospitalized COVID-19 patients are listed in **S2** and **S3 Tables**.

401

### 402 **Isolation and culture of PBMC, pDC and monocytes**

403 PBMC were collected from peripheral blood and isolated and cultured as described (53). pDC and  
404 monocytes were purified from isolated PBMC by magnetic separation by using anti-BDCA4 and  
405 anti-CD14 microbeads (Miltenyi biotech) respectively, as previously described (54). The purity of  
406 the recovered cells was greater than 95% as assessed by flow cytometry analysis with anti-BDCA4  
407 (Miltenyi biotech) or anti-CD14 (BD Biosciences) monoclonal antibodies.

408

### 409 **Virus production**

410 Vero E6 (Vero C1008, clone E6-CRL-1586; ATCC) cells were cultured in Dulbecco's Modified  
411 Eagle Medium (DMEM) supplemented with non-essential amino acids (NEAA, 1x),  
412 penicillin/streptomycin (P/S, 100 U/mL), HEPES buffer (10 mM) and 10% (v/v) Fetal bovine  
413 serum (FBS). A clinical isolate hCoV-19/Italy/UniSR1/2020 (GISAID accession ID:  
414 EPI\_ISL\_413489) was isolated and propagated in Vero E6 cells, and viral titer was determined by  
415 50% tissue culture infective dose (TCID<sub>50</sub>) and plaque assay for confirming the obtained titer.

416

### 417 **Virus Titration**

418 Virus stocks and supernatants of the experimental conditions were titrated using Endpoint Dilutions  
419 Assay (EDA, TCID<sub>50</sub>/mL). Vero E6 cells ( $4 \times 10^5$  cells/mL) were seeded into 96 wells plates and  
420 infected with base 10 dilutions of collected medium, each condition tested in triplicate. After 1 h of  
421 adsorption at 37°C, the cell-free virus was removed, and complete medium was added to cells.  
422 After 72 h, cells were observed to evaluate CPE. TCID<sub>50</sub>/mL was calculated according to the Reed–  
423 Muench method.

424

### 425 **Viral inactivation by UV-C**

426 An aliquot (0.170 mL) of viral stock was place in a 24-well plate in ice to counteract irradiation-  
427 derived heating of the sample and irradiated with approximately 1.8 mW/cm<sup>2</sup> at a work distance of  
428 20 cm for 40 minutes. The viral inactivation was checked using undiluted supernatant in an  
429 infection assay.

430

### 431 **Calu-3 treatment and infection**

432 Calu-3 (Human lung cancer cell line, ATCC HTB-55) were cultured in MEM supplemented with  
433 NEAA (1x), P/S (100 U/mL), Sodium Pyruvate (1 mM), and 10% (v/v) FBS. Calu-3 cells were  
434 seeded into 12-wells plates to reach confluence. Before the viral adsorption, the cells were treated  
435 with 200 µL of the different PBMC supernatants for 1 hour at 37°C. The viral adsorption was  
436 conducted as already described using  $5.62 \times 10^4$  TCID<sub>50</sub>/mL of hCoV-19/Italy/UniSR1/2020. After  
437 then, 500 µL of the different PBMC supernatants were added and the cells were incubated at 37°C  
438 for 24 hours.

439

### 440 **Cell stimulation and supernatant collection**

441 PBMC, pDC and monocytes were pre-incubated for 1 hour at 37°C with infectious or UV-  
442 inactivated SARS-CoV2 at 0.01, 0.02, 0.04 or 0.1 MOI and then cultured at  $2 \times 10^6$  cells/ml in RPMI  
443 1640 in presence of P/S (100 U/mL), L-glutamine (2mM) and 10% FBS for 24 or 48 hours. As  
444 mock-treatment, cells were stimulated with supernatants from Vero E6 uninfected cells at a dilution  
445 corresponding to that of MOI 0.1 infected cultures. Cells were also treated with R848, a specific  
446 TLR7/8 agonist (5 $\mu$ M, Invivogen) as positive control, or with 1000 U/mL of recombinant IFN- $\alpha$ 2  
447 and IFN- $\beta$  (Peprotech). Furthermore, where indicated, PBMC and pDC were also pre-treated for 30  
448 min with 1 $\mu$ M TLR7/8 antagonist, 2087c oligonucleotide (Miltenyi biotech), prior to stimulation  
449 with SARS-CoV2.

450 After 24 or 48 hours, cell culture supernatants were harvested and treated for 30 minutes at 56°C,  
451 then stored at -80°C for later use. SARS-CoV2 inactivation was tested by back titration for each  
452 experiment (see above for details).

453

#### 454 **Detection of cytokines and chemokines in culture supernatants**

455 Release of IFN- $\alpha$ s was measured by a specific ELISA kit (PBL assay science). Production of  
456 cytokines (IL-6, TNF- $\alpha$ , IL-1 $\beta$ , IL-10 and IL-12p70) and chemokines (CXCL-10, CCL-2, CXCL-9,  
457 CXCL-8 and CCL-5) was quantified by specific cytometric bead arrays (BD Biosciences) on a  
458 FACS Canto (BD Biosciences) and analyzed by FCAP array software (BD Biosciences).

459

#### 460 **Flow cytometry analyses**

461 Monoclonal antibodies anti-Lineage cocktail (Lin), PD-L1, CD80, CD86, HLA-DR, CD123,  
462 CXCR-3, CXCR-4, CD62-L and CCR7 as well as IgG1 or IgG2a isotype controls were purchased  
463 from BD Biosciences, while BDCA4 from Miltenyi Biotech. To establish cell viability and exclude  
464 dead cells from flow cytometry analyses, Fixable Viability Dye (FvDye, eBioscience) was always  
465 included in antibody cocktails. In the mixed cell population of PBMC, pDC were considered as  
466 those cells in live/single FvDye-Lineage-CD123<sup>+</sup>BDCA4<sup>+</sup>HLADR<sup>+</sup> gate (**S3A Fig**). Cells ( $1.5 \times 10^6$

467 for PBMC or  $5 \times 10^4$  for isolated pDC) were incubated with monoclonal antibodies at 4°C for 30 min  
468 and then fixed with 4% paraformaldehyde before analysis on a Cytoflex cytometer (Beckman  
469 Coulter). Data were analyzed by Flow Jo software v.10.7 (BD Biosciences). Expression of analyzed  
470 cell surface molecules was evaluated using the median fluorescence intensity (MFI). Only viable  
471 and single cells were considered for further analysis.

472

### 473 **RNA isolation and quantitative real time PCR analysis**

474 Total RNA was isolated by Trizol® Reagent (Invitrogen, Thermo Fischer Scientific), quantified  
475 using a Nanodrop2000 spectrophotometer and quality assessed with an established cut-off of ~1.8  
476 for 260/280 absorbance ratio. Reverse-transcription was conducted by Vilo™ reverse transcriptase  
477 kit (Invitrogen, Thermo Fischer Scientific).

478 Expression of genes encoding Mx1, IFN- $\alpha$ s, IFN- $\beta$ , IFN- $\lambda$ 1, IL-6, ACE-2 and TMPRSS2 was  
479 measured by quantitative real time PCR (q-PCR) using the appropriate TaqMan™ assay and  
480 TaqMan™ Universal Master Mix II (Applied Biosystems, Thermo Fisher Scientific) on a  
481 ViiA™ 7 Instrument (Applied Biosystems, Thermo Fisher Scientific).

482 The housekeeping gene TATA-box-binding protein (TBP) was used as normalizer. Real time  
483 reactions were run at least in duplicates. Sample values for each mRNA were normalized to the  
484 selected housekeeping gene using the formula  $2^{-\Delta Ct}$ .

485

### 486 **Statistical analysis**

487 Statistical analysis was performed using One-way Repeated-Measures ANOVA when three or  
488 more stimulation conditions were compared. A two-tailed paired Student's t-test was used when  
489 only two stimulation conditions were compared. Results were shown as mean values  $\pm$  SEM. P  
490  $\leq 0.05$  was considered statistically significant. In the figures, star scale was assigned as follows:

491 \*= $p \leq 0.05$ ; \*\*= $p \leq 0.01$ ; \*\*\*= $p \leq 0.001$ .

492

493 **ACKNOWLEDGEMENTS**

494 The authors acknowledge Dr. Valentina Tirelli and Dr. Massimo Sanchez of Flow Cytometry  
495 Facility (FAST, Istituto Superiore di Sanità, Rome, Italy), Concetta Fabiani, Eleonora Benedetti and  
496 Angela Di Martino (Department of Infectious Diseases, Istituto Superiore di Sanità, Rome, Italy),  
497 and Dr. Silvia Riccetti (Department of Molecular Medicine, University of Padua, Padua, Italy) for  
498 technical support.

499 This work was funded by Istituto Superiore di Sanità and partly co-financed by the Italian Ministry  
500 of Health (grant GR-2016-02363749 to MS) and the European Union's Horizon 2020 research and  
501 innovation programme, under grant agreement no. 874735 (VEO) to LB.

502

503 **COMPETING INTERESTS**

504 The authors have no conflict of interest to declare.

505

506 **DATA AND MATERIALS AVAILABILITY**

507 This study did not generate new unique reagents/dataset/code. All data are available in the main  
508 text or the supplementary materials.

509

510 **REFERENCES**

511

- 512 1. Huang C, Wang Y, Li X, Ren L, Zhao J, Hu Y, et al. Clinical features of patients infected  
513 with 2019 novel coronavirus in Wuhan, China. *Lancet*. 2020;395(10223):497-506.
- 514 2. Lavezzo E, Franchin E, Ciavarella C, Cuomo-Dannenburg G, Barzon L, Del Vecchio C, et  
515 al. Suppression of a SARS-CoV-2 outbreak in the Italian municipality of Vo'. *Nature*.  
516 2020;584(7821):425-9.
- 517 3. Ding Q, Lu P, Fan Y, Xia Y, Liu M. The clinical characteristics of pneumonia patients  
518 coinfecting with 2019 novel coronavirus and influenza virus in Wuhan, China. *J Med Virol*. 2020.
- 519 4. McGonagle D, O'Donnell JS, Sharif K, Emery P, Bridgewood C. Immune mechanisms of  
520 pulmonary intravascular coagulopathy in COVID-19 pneumonia. *Lancet Rheumatol*.  
521 2020;2(7):e437-e45.
- 522 5. Byambasuren O, Cardona M, Bell K, Clark J, McLaws M, Glasziou P. Estimating the extent  
523 of asymptomatic COVID-19 and its potential for community transmission: Systematic review and  
524 meta-analysis JAMMI. 2020;<https://doi.org/10.3138/jammi-2020-0030>.
- 525 6. Tay MZ, Poh CM, Renia L, MacAry PA, Ng LFP. The trinity of COVID-19: immunity,  
526 inflammation and intervention. *Nat Rev Immunol*. 2020;20(6):363-74.
- 527 7. Hadjadj J, Yatim N, Barnabei L, Corneau A, Boussier J, Smith N, et al. Impaired type I  
528 interferon activity and inflammatory responses in severe COVID-19 patients. *Science*.  
529 2020;369(6504):718-24.
- 530 8. Lee JS, Park S, Jeong HW, Ahn JY, Choi SJ, Lee H, et al. Immunophenotyping of COVID-  
531 19 and influenza highlights the role of type I interferons in development of severe COVID-19. *Sci*  
532 *Immunol*. 2020;5(49).
- 533 9. Sa Ribero M, Jouvenet N, Dreux M, Nisole S. Interplay between SARS-CoV-2 and the type  
534 I interferon response. *PLoS Pathog*. 2020;16(7):e1008737.
- 535 10. Shin D, Mukherjee R, Grewe D, Bojkova D, Baek K, Bhattacharya A, et al. Papain-like  
536 protease regulates SARS-CoV-2 viral spread and innate immunity. *Nature*. 2020;587(7835):657-62.
- 537 11. Petersen E, Koopmans M, Go U, Hamer DH, Petrosillo N, Castelli F, et al. Comparing  
538 SARS-CoV-2 with SARS-CoV and influenza pandemics. *Lancet Infect Dis*. 2020;20(9):e238-e44.
- 539 12. Blanco-Melo D, Nilsson-Payant BE, Liu WC, Uhl S, Hoagland D, Moller R, et al.  
540 Imbalanced Host Response to SARS-CoV-2 Drives Development of COVID-19. *Cell*.  
541 2020;181(5):1036-45 e9.
- 542 13. Park A, Iwasaki A. Type I and Type III Interferons - Induction, Signaling, Evasion, and  
543 Application to Combat COVID-19. *Cell Host Microbe*. 2020;27(6):870-8.
- 544 14. Li JY, Liao CH, Wang Q, Tan YJ, Luo R, Qiu Y, et al. The ORF6, ORF8 and nucleocapsid  
545 proteins of SARS-CoV-2 inhibit type I interferon signaling pathway. *Virus Res*. 2020;286:198074.
- 546 15. Konno Y, Kimura I, Uriu K, Fukushi M, Irie T, Koyanagi Y, et al. SARS-CoV-2 ORF3b Is  
547 a Potent Interferon Antagonist Whose Activity Is Increased by a Naturally Occurring Elongation  
548 Variant. *Cell Rep*. 2020;32(12):108185.
- 549 16. Yuen CK, Lam JY, Wong WM, Mak LF, Wang X, Chu H, et al. SARS-CoV-2 nsp13,  
550 nsp14, nsp15 and orf6 function as potent interferon antagonists. *Emerg Microbes Infect*.  
551 2020;9(1):1418-28.
- 552 17. McKechnie JL, Blish CA. The Innate Immune System: Fighting on the Front Lines or  
553 Fanning the Flames of COVID-19? *Cell Host Microbe*. 2020;27(6):863-9.
- 554 18. Lei X, Dong X, Ma R, Wang W, Xiao X, Tian Z, et al. Activation and evasion of type I  
555 interferon responses by SARS-CoV-2. *Nat Commun*. 2020;11(1):3810.
- 556 19. Gilliet M, Cao W, Liu YJ. Plasmacytoid dendritic cells: sensing nucleic acids in viral  
557 infection and autoimmune diseases. *Nat Rev Immunol*. 2008;8(8):594-606.
- 558 20. Ziegler CGK, Allon SJ, Nyquist SK, Mbano IM, Miao VN, Tzouanas CN, et al. SARS-  
559 CoV-2 Receptor ACE2 Is an Interferon-Stimulated Gene in Human Airway Epithelial Cells and Is  
560 Detected in Specific Cell Subsets across Tissues. *Cell*. 2020;181(5):1016-35 e19.

- 561 21. Boumaza A, Gay L, Mezouar S, Bestion E, Diallo AB, Michel M, et al. Monocytes and  
562 macrophages, targets of SARS-CoV-2: the clue for Covid-19 immunoparalysis. *J Infect Dis.* 2021.
- 563 22. Alculumbre SG, Saint-Andre V, Di Domizio J, Vargas P, Sirven P, Bost P, et al.  
564 Diversification of human plasmacytoid dendritic cells in response to a single stimulus. *Nat*  
565 *Immunol.* 2018;19(1):63-75.
- 566 23. Lazear HM, Schoggins JW, Diamond MS. Shared and Distinct Functions of Type I and  
567 Type III Interferons. *Immunity.* 2019;50(4):907-23.
- 568 24. Sokol CL, Luster AD. The chemokine system in innate immunity. *Cold Spring Harb*  
569 *Perspect Biol.* 2015;7(5).
- 570 25. Combes AJ, Courau T, Kuhn NF, Hu KH, Ray A, Chen WS, et al. Global Absence and  
571 Targeting of Protective Immune States in Severe COVID-19. *Res Sq.* 2020.
- 572 26. Garcia LF. Immune Response, Inflammation, and the Clinical Spectrum of COVID-19.  
573 *Front Immunol.* 2020;11:1441.
- 574 27. Moore JB, June CH. Cytokine release syndrome in severe COVID-19. *Science.*  
575 2020;368(6490):473-4.
- 576 28. Khalil BA, Elemam NM, Maghazachi AA. Chemokines and chemokine receptors during  
577 COVID-19 infection. *Comput Struct Biotechnol J.* 2021;19:976-88.
- 578 29. Maghazachi AA, Skalhegg BS, Rolstad B, Al-Aoukaty A. Interferon-inducible protein-10  
579 and lymphotactin induce the chemotaxis and mobilization of intracellular calcium in natural killer  
580 cells through pertussis toxin-sensitive and -insensitive heterotrimeric G-proteins. *FASEB J.*  
581 1997;11(10):765-74.
- 582 30. Sauty A, Dziejman M, Taha RA, Iarossi AS, Neote K, Garcia-Zepeda EA, et al. The T cell-  
583 specific CXC chemokines IP-10, Mig, and I-TAC are expressed by activated human bronchial  
584 epithelial cells. *J Immunol.* 1999;162(6):3549-58.
- 585 31. Xu ZS, Shu T, Kang L, Wu D, Zhou X, Liao BW, et al. Temporal profiling of plasma  
586 cytokines, chemokines and growth factors from mild, severe and fatal COVID-19 patients. *Signal*  
587 *Transduct Target Ther.* 2020;5(1):100.
- 588 32. Grasselli G, Zangrillo A, Zanella A, Antonelli M, Cabrini L, Castelli A, et al. Baseline  
589 Characteristics and Outcomes of 1591 Patients Infected With SARS-CoV-2 Admitted to ICUs of  
590 the Lombardy Region, Italy. *JAMA.* 2020;323(16):1574-81.
- 591 33. Zheng S, Fan J, Yu F, Feng B, Lou B, Zou Q, et al. Viral load dynamics and disease severity  
592 in patients infected with SARS-CoV-2 in Zhejiang province, China, January-March 2020:  
593 retrospective cohort study. *BMJ.* 2020;369:m1443.
- 594 34. Pelaia C, Tinello C, Vatrella A, De Sarro G, Pelaia G. Lung under attack by COVID-19-  
595 induced cytokine storm: pathogenic mechanisms and therapeutic implications. *Ther Adv Respir*  
596 *Dis.* 2020;14:1753466620933508.
- 597 35. Xu Z, Shi L, Wang Y, Zhang J, Huang L, Zhang C, et al. Pathological findings of COVID-  
598 19 associated with acute respiratory distress syndrome. *Lancet Respir Med.* 2020;8(4):420-2.
- 599 36. Pontelli MC, Castro IA, Martins RB, Veras FP, LaSerra L, Nascimento DC, et al. Infection  
600 of human lymphomononuclear cells by SARS-CoV-2. *bioRxiv* 2020;doi:  
601 <https://doi.org/10.1101/2020.07.28.225912>
- 602 37. Clementi N, Ferrarese R, Criscuolo E, Diotti RA, Castelli M, Scagnolari C, et al. Interferon-  
603 beta-1a Inhibition of Severe Acute Respiratory Syndrome-Coronavirus 2 In Vitro When  
604 Administered After Virus Infection. *J Infect Dis.* 2020;222(5):722-5.
- 605 38. Broggi A, Ghosh S, Sposito B, Spreafico R, Balzarini F, Lo Cascio A, et al. Type III  
606 interferons disrupt the lung epithelial barrier upon viral recognition. *Science.* 2020;369(6504):706-  
607 12.
- 608 39. Zhang Q, Bastard P, Liu Z, Le Pen J, Moncada-Velez M, Chen J, et al. Inborn errors of type  
609 I IFN immunity in patients with life-threatening COVID-19. *Science.* 2020;370(6515).
- 610 40. van der Made CI, Simons A, Schuurs-Hoeijmakers J, van den Heuvel G, Mantere T, Kersten  
611 S, et al. Presence of Genetic Variants Among Young Men With Severe COVID-19. *JAMA.* 2020.

- 612 41. Bastard P, Rosen LB, Zhang Q, Michailidis E, Hoffmann HH, Zhang Y, et al. Auto-  
613 antibodies against type I IFNs in patients with life-threatening COVID-19. *Science*. 2020.
- 614 42. Cervantes-Barragan L, Zust R, Weber F, Spiegel M, Lang KS, Akira S, et al. Control of  
615 coronavirus infection through plasmacytoid dendritic-cell-derived type I interferon. *Blood*.  
616 2007;109(3):1131-7.
- 617 43. Raj VS, Smits SL, Provacia LB, van den Brand JM, Wiersma L, Ouwendijk WJ, et al.  
618 Adenosine deaminase acts as a natural antagonist for dipeptidyl peptidase 4-mediated entry of the  
619 Middle East respiratory syndrome coronavirus. *J Virol*. 2014;88(3):1834-8.
- 620 44. Scheuplein VA, Seifried J, Malczyk AH, Miller L, Hocker L, Vergara-Alert J, et al. High  
621 secretion of interferons by human plasmacytoid dendritic cells upon recognition of Middle East  
622 respiratory syndrome coronavirus. *J Virol*. 2015;89(7):3859-69.
- 623 45. Onodi F, Bonnet-Madin L, Meertens L, Karpf L, Poirot J, Zhang SY, et al. SARS-CoV-2  
624 induces human plasmacytoid predendritic cell diversification via UNC93B and IRAK4. *J Exp Med*.  
625 2021;218(4).
- 626 46. Palucka AK, Blanck JP, Bennett L, Pascual V, Banchereau J. Cross-regulation of TNF and  
627 IFN-alpha in autoimmune diseases. *Proc Natl Acad Sci U S A*. 2005;102(9):3372-7.
- 628 47. Zhou R, To KK, Wong YC, Liu L, Zhou B, Li X, et al. Acute SARS-CoV-2 Infection  
629 Impairs Dendritic Cell and T Cell Responses. *Immunity*. 2020;53(4):864-77 e5.
- 630 48. Laing AG, Lorenc A, Del Molino Del Barrio I, Das A, Fish M, Monin L, et al. A dynamic  
631 COVID-19 immune signature includes associations with poor prognosis. *Nat Med*.  
632 2020;26(10):1623-35.
- 633 49. Zingaropoli MA, Nijhawan P, Carraro A, Pasculli P, Zuccala P, Perri V, et al. Increased  
634 sCD163 and sCD14 Plasmatic Levels and Depletion of Peripheral Blood Pro-Inflammatory  
635 Monocytes, Myeloid and Plasmacytoid Dendritic Cells in Patients With Severe COVID-19  
636 Pneumonia. *Front Immunol*. 2021;12:627548.
- 637 50. Sanchez-Cerrillo I, Landete P, Aldave B, Sanchez-Alonso S, Sanchez-Azofra A, Marcos-  
638 Jimenez A, et al. COVID-19 severity associates with pulmonary redistribution of CD1c+ DCs and  
639 inflammatory transitional and nonclassical monocytes. *J Clin Invest*. 2020;130(12):6290-300.
- 640 51. Mehta P, McAuley DF, Brown M, Sanchez E, Tattersall RS, Manson JJ, et al. COVID-19:  
641 consider cytokine storm syndromes and immunosuppression. *Lancet*. 2020;395(10229):1033-4.
- 642 52. Fara A, Mitrev Z, Rosalia RA, Assas BM. Cytokine storm and COVID-19: a chronicle of  
643 pro-inflammatory cytokines. *Open Biol*. 2020;10(9):200160.
- 644 53. Severa M, Rizzo F, Srinivasan S, Di Dario M, Giacomini E, Buscarinu MC, et al. A cell  
645 type-specific transcriptomic approach to map B cell and monocyte type I interferon-linked  
646 pathogenic signatures in Multiple Sclerosis. *J Autoimmun*. 2019;101:1-16.
- 647 54. Severa M, Giacomini E, Gafa V, Anastasiadou E, Rizzo F, Corazzari M, et al. EBV  
648 stimulates TLR- and autophagy-dependent pathways and impairs maturation in plasmacytoid  
649 dendritic cells: implications for viral immune escape. *Eur J Immunol*. 2013;43(1):147-58.

650  
651



652 **FIGURE LEGENDS**

653

654 **1 Fig. Human PBMC are not permissive to SARS-CoV-2 infection.** Virus titers were evaluated  
655 in viral inoculum (T0) as well as in peripheral blood mononuclear cell (PBMC) supernatants after  
656 24 (T1) and 48 hours (T2) post SARS-CoV-2 infection in cultures treated at a multiplicity of  
657 infection (MOI) of 0.01, 0.02, 0.04 and 0.1. Shown results were calculated by Endpoint Dilution  
658 Assay by using the Reed-Muench formula and reported as TCID<sub>50</sub>/ml and derived from three  
659 experiments conducted separately.

660

661 **2 Fig. SARS-CoV-2 stimulation induces a TLR7/8-dependent type I and III IFN response in**  
662 **PBMC.** Peripheral blood mononuclear cells (PBMC) were left untreated (not stimulated, ns) or  
663 stimulated for 24 hours with the TLR7/8 agonist R848 (5μM) as positive control, with SARS-CoV-  
664 2 (CoV2) at different multiplicity of infection (MOI; 0.02, 0.04 and 0.1) in presence or absence of a  
665 30 minute pre-treatment with a specific TLR7/8 inhibitor (I-TLR7/8, 1μM) or with Mock medium  
666 only. (A) Relative expression of IFN-αs, IFN-β, IFN-λ1 genes was measured by quantitative real  
667 time PCR analysis. All quantification data are normalized to TBP level by using the equation  $2^{-\Delta Ct}$ .  
668 (B) Production of IFN-αs was tested by specific ELISA in 24 hour-collected cell culture  
669 supernatants. (C) Mx1 gene expression was quantified by real time PCR as described above. Shown  
670 results were mean relative values ± SEM of 5 independent experiments. P-values were depicted as  
671 follows: \*p≤0.05; \*\* p≤0.001.

672

673 **Fig. 3. SARS-CoV-2 stimulation induces a TLR7/8-dependent cytokine and chemokine**  
674 **production in PBMC.** Peripheral blood mononuclear cells (PBMC) were left untreated (not  
675 stimulated, ns) or stimulated for 24 hours with the TLR7/8 agonist R848 (5μM) as positive control,  
676 with SARS-CoV-2 (CoV2) at different multiplicity of infection (MOI; 0.02, 0.04 and 0.1) in  
677 presence or absence of a 30 minute pre-treatment with a specific TLR7/8 inhibitor (I-TLR7/8,  
678 1μM), or with Mock medium only. Production of cytokines (IL-6, TNF-α, IL-1β, IL-10, IL-12p70)  
679 (A) and chemokines (CXCL-10, CXCL-9, CCL-2, CXCL-8, CCL-5) (B) was tested by  
680 multiparametric cytokine bead arrays in collected cell culture supernatants. Shown results were  
681 mean relative values ± SEM of 5 independent experiments. P-values were depicted as follows:  
682 \*p≤0.05.

683

684 **4 Fig. SARS-CoV-2-mediated cytokine and chemokine production is not induced upon PBMC**  
685 **stimulation with UV-inactivated virus.** Peripheral blood mononuclear cells (PBMC) were left  
686 untreated (not stimulated, ns) or stimulated for 24 hours with infectious or UV-inactivated (UV-I)  
687 SARS-CoV-2 (CoV2, MOI=0.04) in presence or absence of a 30 minute pre-treatment with a  
688 specific TLR7/8 inhibitor (I-TLR7/8, 1μM). Production of cytokines (IFN-αs, IL-6, TNF-α, IL-1β)  
689 (A) and chemokines (CXCL-10, CXCL-9, CCL-2) (B) was tested by specific ELISA (IFN-αs only)  
690 or multiparametric cytokine bead arrays in collected cell culture supernatants. Shown results were  
691 mean relative values ± SEM of 3 independent experiments. P-values were depicted as follows:  
692 \*p≤0.05.

693

694 **5 Fig. Type I IFN-induced anti-viral state impacts on SARS-CoV-2 infected Calu-3 lung**  
695 **epithelial cell line.** (A) The human lung epithelial cell line Calu-3 was left untreated (not  
696 stimulated, ns), infected for 24 hours with SARS-CoV-2 at the back titration dose calculated in  
697 peripheral blood mononuclear cells (PBMC) (10<sup>4</sup> TCID<sub>50</sub>/ml for 0.02 MOI) or treated with 24 hour-  
698 supernatants collected from either ns PBMC cultures (sup PBMC\_ns, grey dotted bars) or from  
699 SARS-CoV-2 (MOI=0.02)-treated PBMC cultures (sup PBMC\_CoV2, red transverse striped bars).  
700 Relative expression of Mx1 and IL-6 genes was measured by quantitative real time PCR analysis.  
701 All quantification data are normalized to TBP level by using the equation  $2^{-\Delta Ct}$ . (B) Calu-3 cell line  
702 was infected with SARS-CoV-2 at the back titrated dose calculated in PBMC (10<sup>4</sup> TCID<sub>50</sub>/ml for

703 0.02 MOI) in presence of 24 hour-supernatants collected from either ns PBMC cultures (sup  
704 PBMC\_ns, grey dotted bars) or from SARS-CoV-2 (MOI=0.02)-treated PBMC cultures (sup  
705 PBMC\_CoV2, red striped bars). Mx1 gene expression was quantified by real time PCR and  
706 quantification data normalized to TBP level by using the equation  $2^{-\Delta Ct}$ . (C) Virus titers were  
707 evaluated in supernatants from infected Calu-3 cultures described in (B) by Endpoint Dilution  
708 Assay by using the Reed-Muench formula and reported as TCID<sub>50</sub>/ml.  
709 Shown results were mean relative values  $\pm$  SEM of 3 independent experiments. P-values were  
710 depicted as follows: \*p $\leq$ 0.05; \*\* p $\leq$ 0.001.

711  
712 **6 Fig. SARS-CoV-2 stimulation drives TLR7-dependent type I IFN production and**  
713 **phenotypical modification in pDC.** Purified plasmacytoid dendritic cells (pDC) were left  
714 untreated (not stimulated, ns) or stimulated for 24 hours with the TLR7/8 agonist R848 (5 $\mu$ M) as  
715 positive control, with SARS-CoV-2 (CoV2; MOI=0.1) in presence or absence of a 30 minute pre-  
716 treatment with a specific TLR7/8 inhibitor (I-TLR7/8, 1 $\mu$ M), or with Mock medium only. (A)  
717 Production of IFN- $\alpha$ s was tested by specific ELISA in 24 hour-collected pDC culture supernatants.  
718 (B) pDC stimulated for 24 hours as described above were stained with anti-BDCA4, PD-L1, CD80  
719 and CD86 antibodies. The percentage (%) of pDC sub-populations was evaluated by flow  
720 cytometry in live/single BDCA4<sup>+</sup> pDC; in particular P1-pDC (PD-L1<sup>+</sup>CD80<sup>+</sup>, in blue), P2-pDC  
721 (PD-L1<sup>+</sup>CD80<sup>+</sup>, in red) and P3-pDC (PD-L1<sup>-</sup>CD80<sup>+</sup>, in green). Representative dot plot profile out  
722 of 3 different experiments independently conducted is shown. (C) Surface expression of CD86, PD-  
723 L1 and CD80 was determined as mean fluorescence intensity (MFI) by flow cytometer analysis. (D)  
724 Production of TNF- $\alpha$  and IL-6 was tested by cytometric bead assay in 24 hour-collected pDC  
725 culture supernatants. Shown results were mean relative values  $\pm$  SEM of 3 independent  
726 experiments. P-values were depicted as follows: \*p $\leq$ 0.05; \*\* p $\leq$ 0.001.

727  
728 **7 Fig. pDC differently activate and express chemokine receptors for homing to SARS-CoV-2**  
729 **infected tissues in COVID-19 asymptomatic and hospitalized patients.** Freshly isolated  
730 peripheral blood mononuclear cells (PBMC) from asymptomatic (CP-AS, n=8) and hospitalized  
731 COVID-19 patients (CP, n=6) as well as matched healthy donors (HD, n=5) were stained with a  
732 cocktails of antibodies to study by flow cytometry plasmacytoid dendritic cell (pDC) frequency and  
733 absolute number (A), diversification and activation status (Lineage, CD123, BDCA-4, HLA-DR,  
734 PD-L1, CD80 and CD86) (B, C, D), as well as expression of chemokine receptors (Lineage,  
735 CD123, BDCA-4, HLA-DR, CXCR4, CXCR3, CCR7 and CD62-L) (E, F). The percentage (%) of  
736 shown pDC sub-populations (B, C, E) was evaluated in live/single Lineage<sup>-</sup>  
737 CD123<sup>+</sup>BDCA4<sup>+</sup>HLADR<sup>+</sup> gated pDC and depicted for each studied patients or HD together with  
738 mean  $\pm$  SEM values. Surface expression of PD-L1, CD80, CD86 (D) and CXCR4, CXCR3, CD62-  
739 L, CCR7 (F), was determined as mean fluorescence intensity (MFI) and shown results were mean  
740 relative values  $\pm$  SEM of analyzed patients or HD. P-values were depicted as follows: \*p $\leq$ 0.05; \*\*  
741 p $\leq$ 0.001; \*\*\* p $\leq$ 0.0001.

742  
743 **8 Fig. COVID-19 asymptomatic and hospitalized patients display a specular anti-viral and**  
744 **pro-inflammatory profile.** Peripheral blood mononuclear cells (PBMC) and sera were collected  
745 from asymptomatic (CP-AS, n=8) and hospitalized COVID-19 patients (CP, n=6) as well as  
746 matched healthy donors (HD, n=5). (A) Relative expression of Mx1 gene was measured by  
747 quantitative real time PCR analysis and normalized to TBP level by using the equation  $2^{-\Delta Ct}$  in total  
748 RNA isolated from *ex vivo* PBMC. (B) Production of IFN- $\alpha$ s was tested in serum samples by a  
749 specific ELISA kit. Production of cytokines (IL-6, TNF- $\alpha$ , IL-1 $\beta$ , IL-10) (C) and chemokines  
750 (CXCL-10, CCL-2, CXCL-8) (D) was tested by multiparametric cytokine bead arrays in collected  
751 serum samples. Shown results were mean relative values  $\pm$  SEM of analyzed patients or HD. P-  
752 values were depicted as follows: \*p $\leq$ 0.05; \*\* p $\leq$ 0.001; \*\*\* p $\leq$ 0.0001.

753

754 **SUPPORTING INFORMATION**

755 **S1 Fig. Kinetic of expression of cytokine and chemokine in PBMC stimulated by SARS-CoV-**  
756 **2.** Peripheral blood mononuclear cells (PBMC) were left untreated (not stimulated, ns) or stimulated  
757 for 24 or 48 hours with SARS-CoV-2 (MOI=0.04 and MOI=0.1) (**A, B**) Production of cytokine IL-  
758 6 (**A**) and chemokines CXCL-10 and CXCL-9 (**B**) was tested by multiparametric cytokine bead  
759 arrays in collected cell culture supernatants. Shown results were mean relative values  $\pm$  SEM of 3  
760 independent experiments. P-values were calculated by two-tailed Students' t-test and were depicted  
761 as follows: \* $p \leq 0.05$ ; \*\* $p \leq 0.01$ . **S2 Fig.** Analysis of SARS-CoV-2 entry factors in pDC and  
762 monocytes and cytokine production in isolated CD14<sup>+</sup> monocytes.

763 **S2 Fig. Analysis of SARS-CoV-2 entry factors in pDC and monocytes and cytokine**  
764 **production in isolated CD14<sup>+</sup> monocytes.** (**A, B**) pDC, monocytes and Calu-3 cell line were left  
765 not stimulated (ns) or stimulated with 1000 U/mL of recombinant IFN- $\alpha$  or IFN- $\beta$ . Gene expression  
766 of ACE-2, TMPRSS2 and Mx1 was measured by quantitative RT-PCR. (**C**) Monocytes were left  
767 untreated (not stimulated, ns) or stimulated for 24 hours with SARS-CoV-2 (MOI=0.04 and  
768 MOI=0.1). Production of IFN- $\alpha$ s and IL-6 was tested by specific ELISA in collected cell culture  
769 supernatants. Shown results were mean relative values  $\pm$  SEM of 3 independent experiments.

770 **S3 Fig. Representative gating strategy for pDC phenotypical analysis in COVID-19 patients.**  
771 Freshly isolated peripheral blood mononuclear cells (PBMC) from asymptomatic (CP-AS, n=8) and  
772 hospitalized COVID-19 patients (CP, n=6) and matched healthy donors (HD, n=5) were stained  
773 with a well-established antibody cocktails to study by flow cytometry plasmacytoid dendritic cell  
774 (pDC) diversification and activation status as well as expression of chemokine receptors. (**A**) The  
775 percentage (%) of total pDC was evaluated in Fixable viability dye (FvDye)<sup>-</sup> live Lineage-  
776 CD123<sup>+</sup>BDCA4<sup>+</sup> gated cells. In pDC we also evaluated the % of PD-L1 or CD80 expressing cells.  
777 (**B, C**) Surface expression of PD-L1, CD80, CD86 (**B**) and CXCR4, CXCR3, CCR7, CD62-L (**C**)  
778 was determined as mean fluorescence intensity (MFI) in CP or HD gated pDC. Shown dot plots and  
779 histograms are representative of all analyzed CP and HD.

780

781 **S1Table.** Evaluation of cell death in human PBMC cultures treated with live SARS-CoV2.

782 **S2 Table.** Main demographic and clinical characteristics of hospitalized COVID-19 patients.

783 **S3 Table.** Main demographic and clinical characteristics of asymptomatic COVID-19 patients.

784

**Fig 1.**

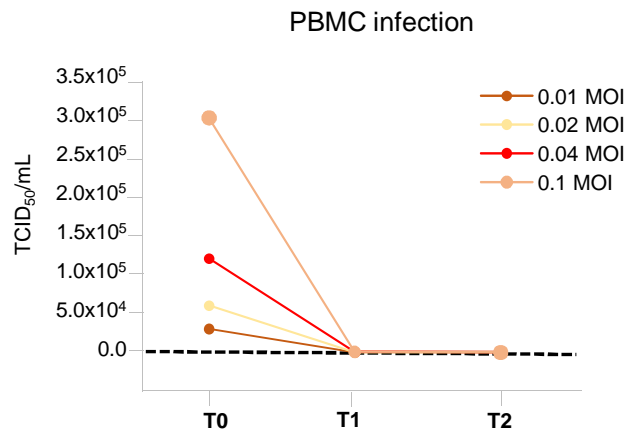

**Fig 2.**

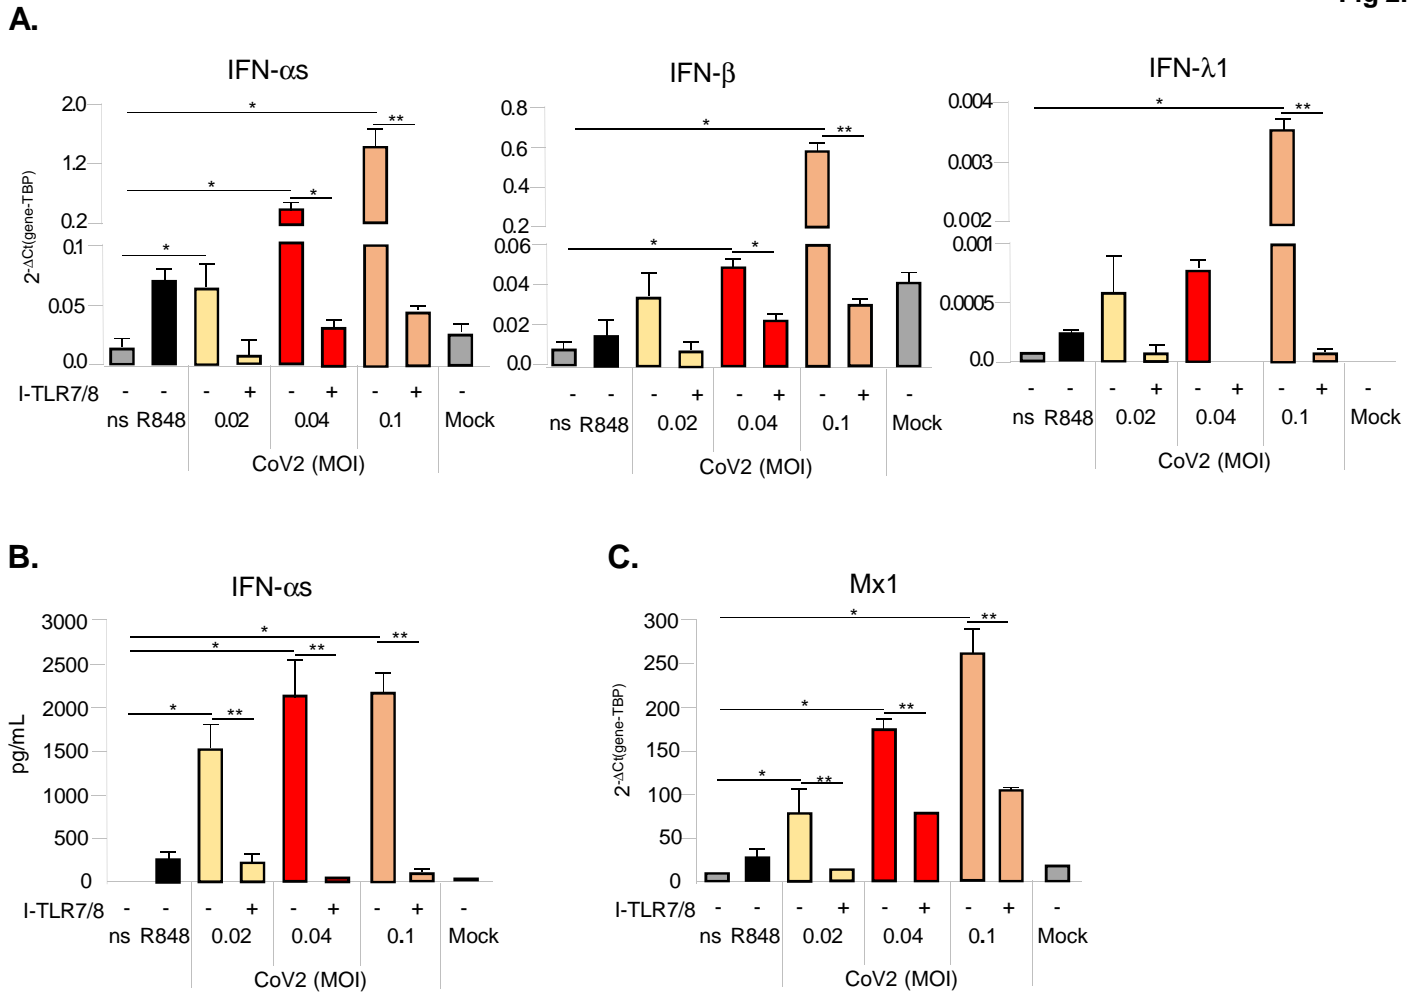

**Fig 3.**

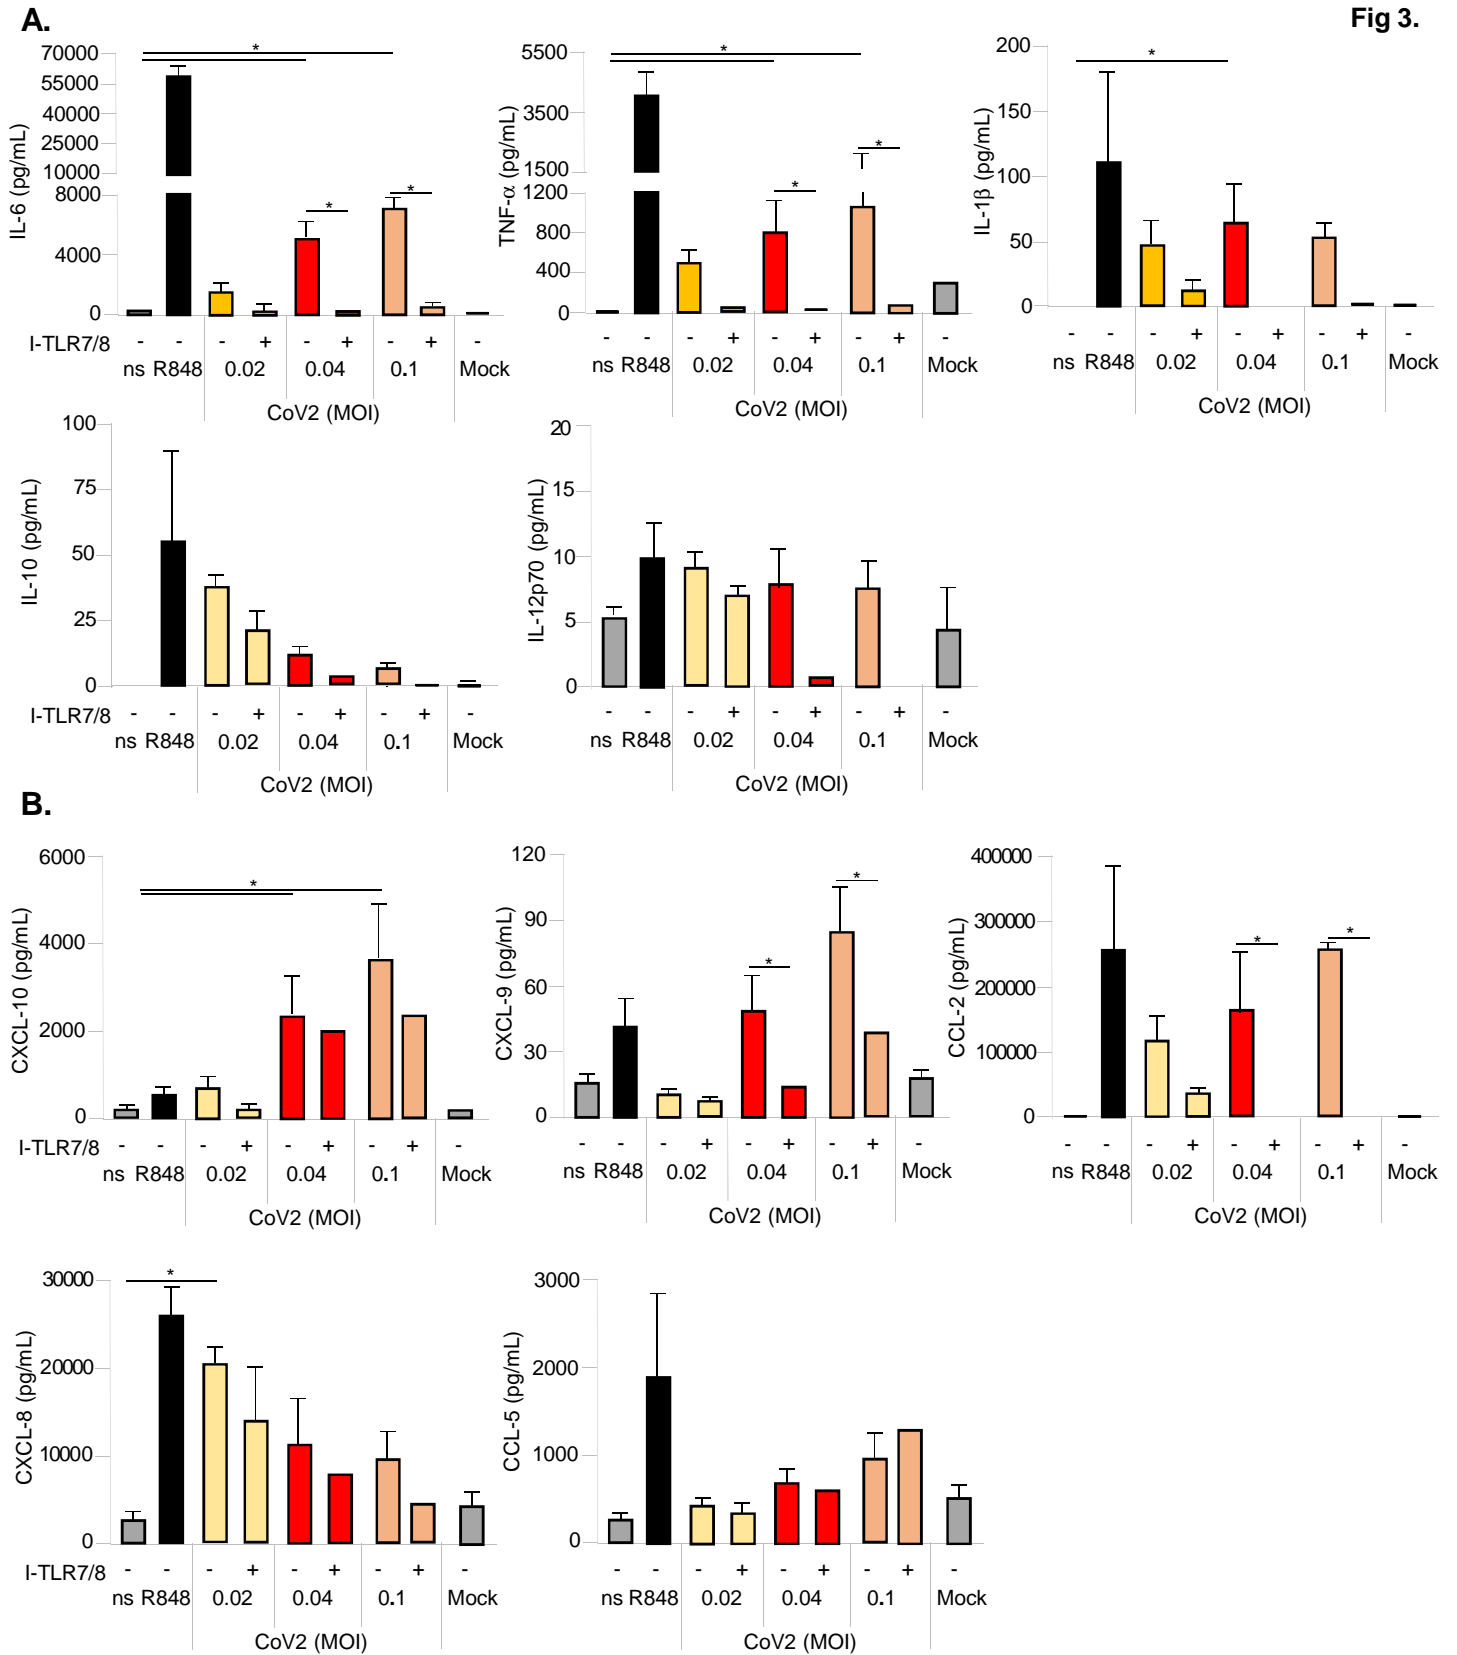

**Fig 4.**

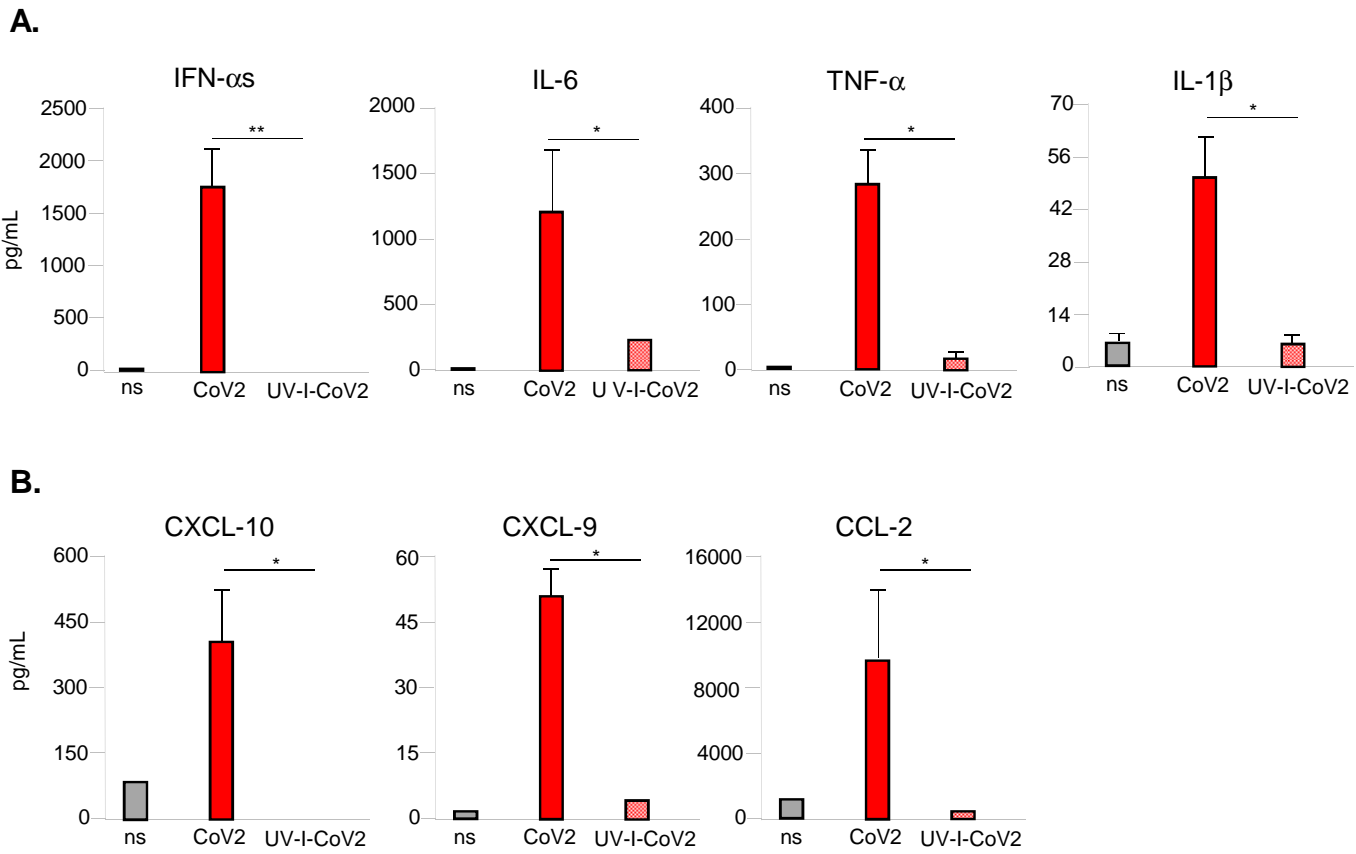

Fig 5.

A.

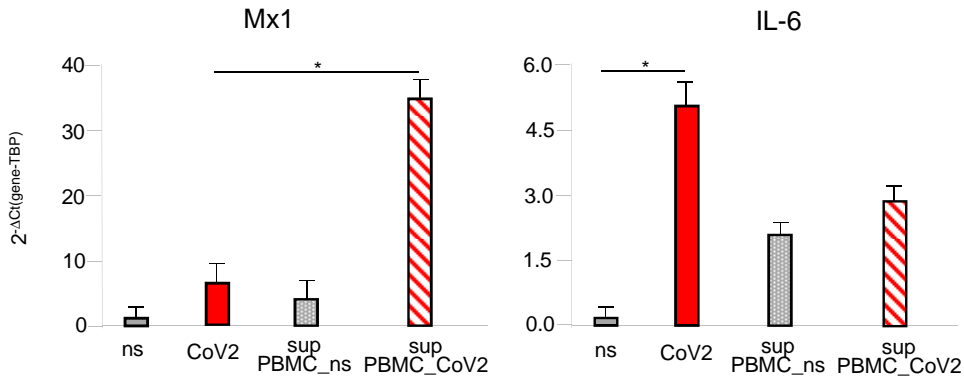

B.

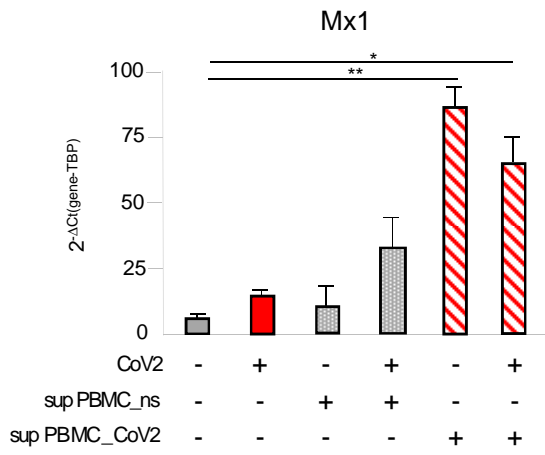

C.

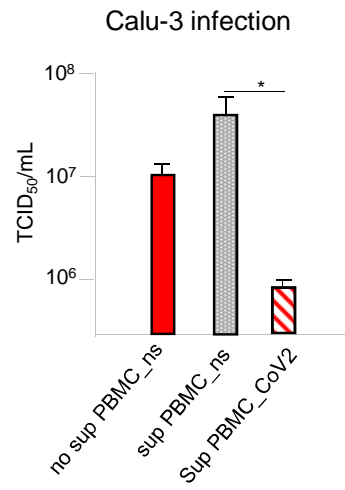



Fig 6.

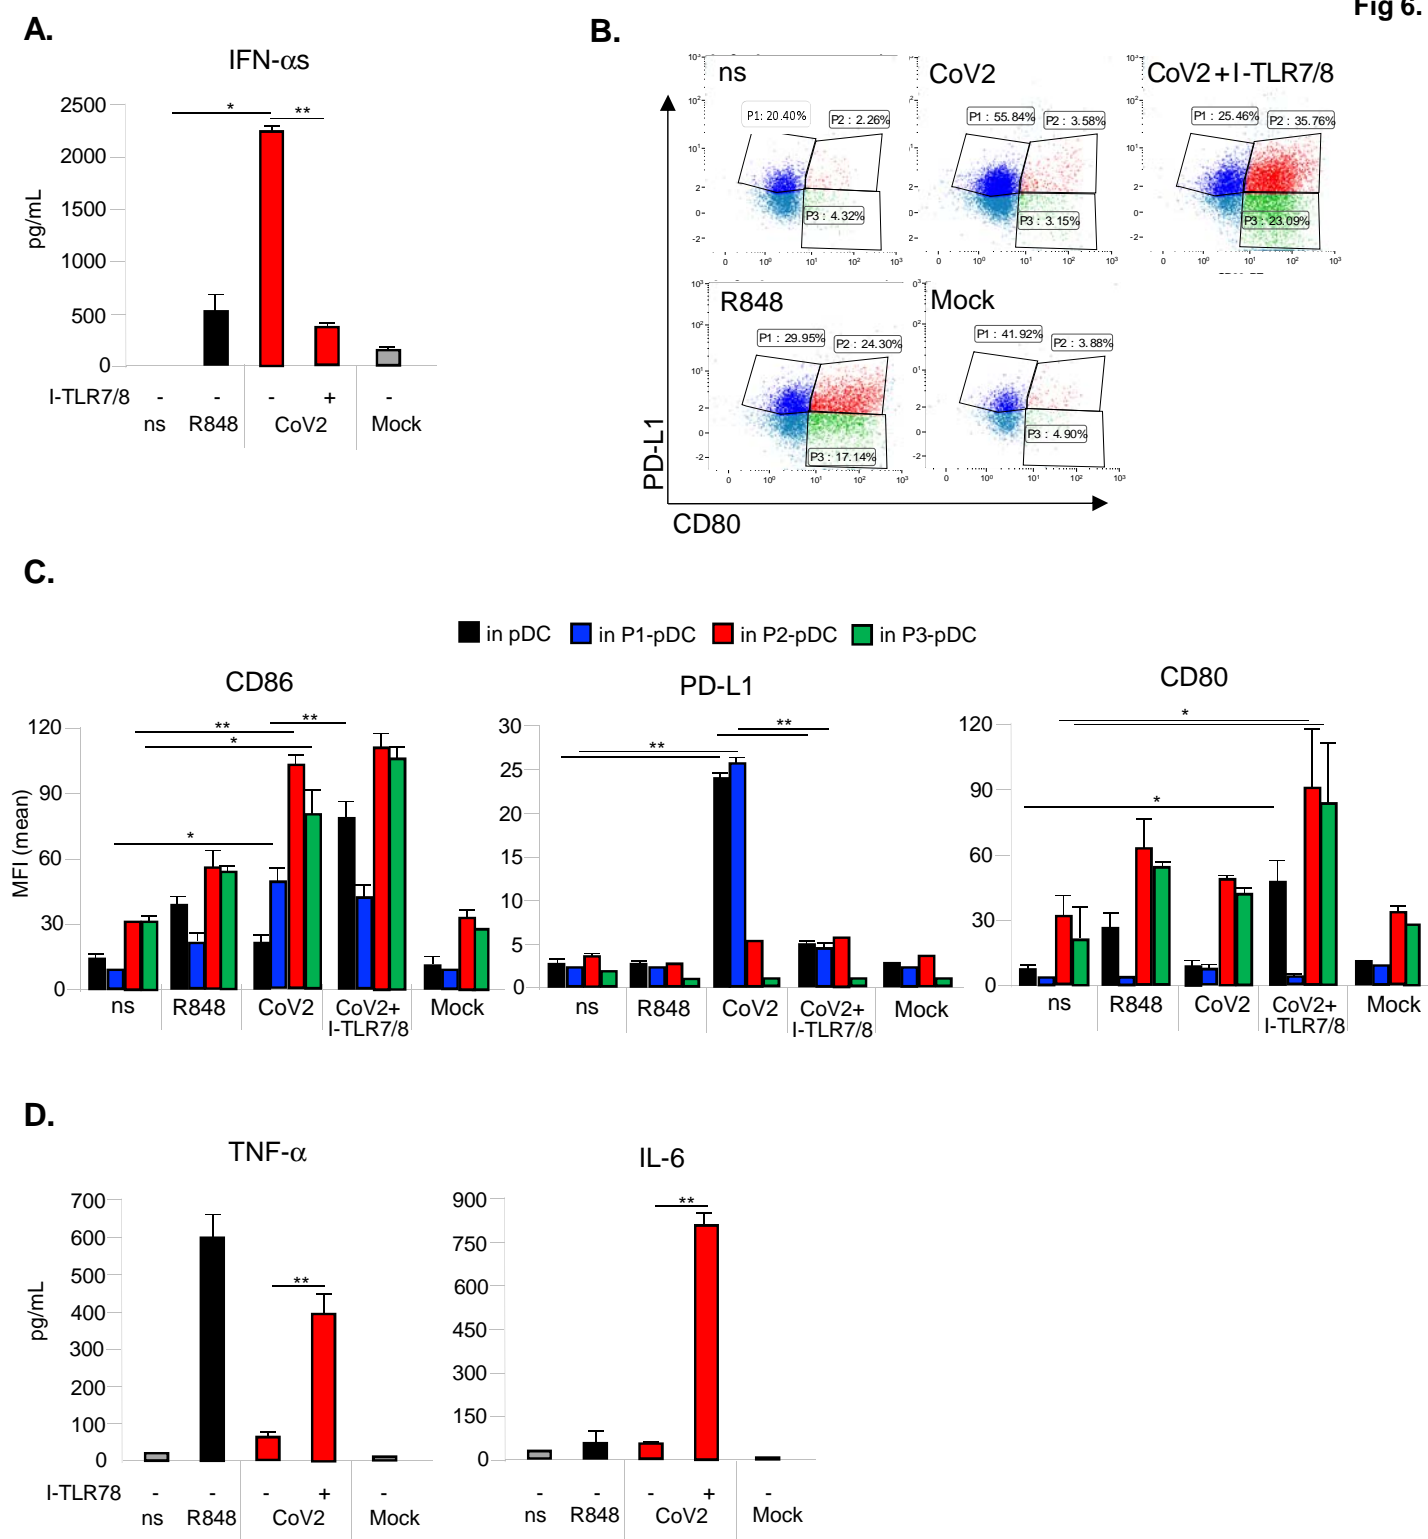

Fig 7.

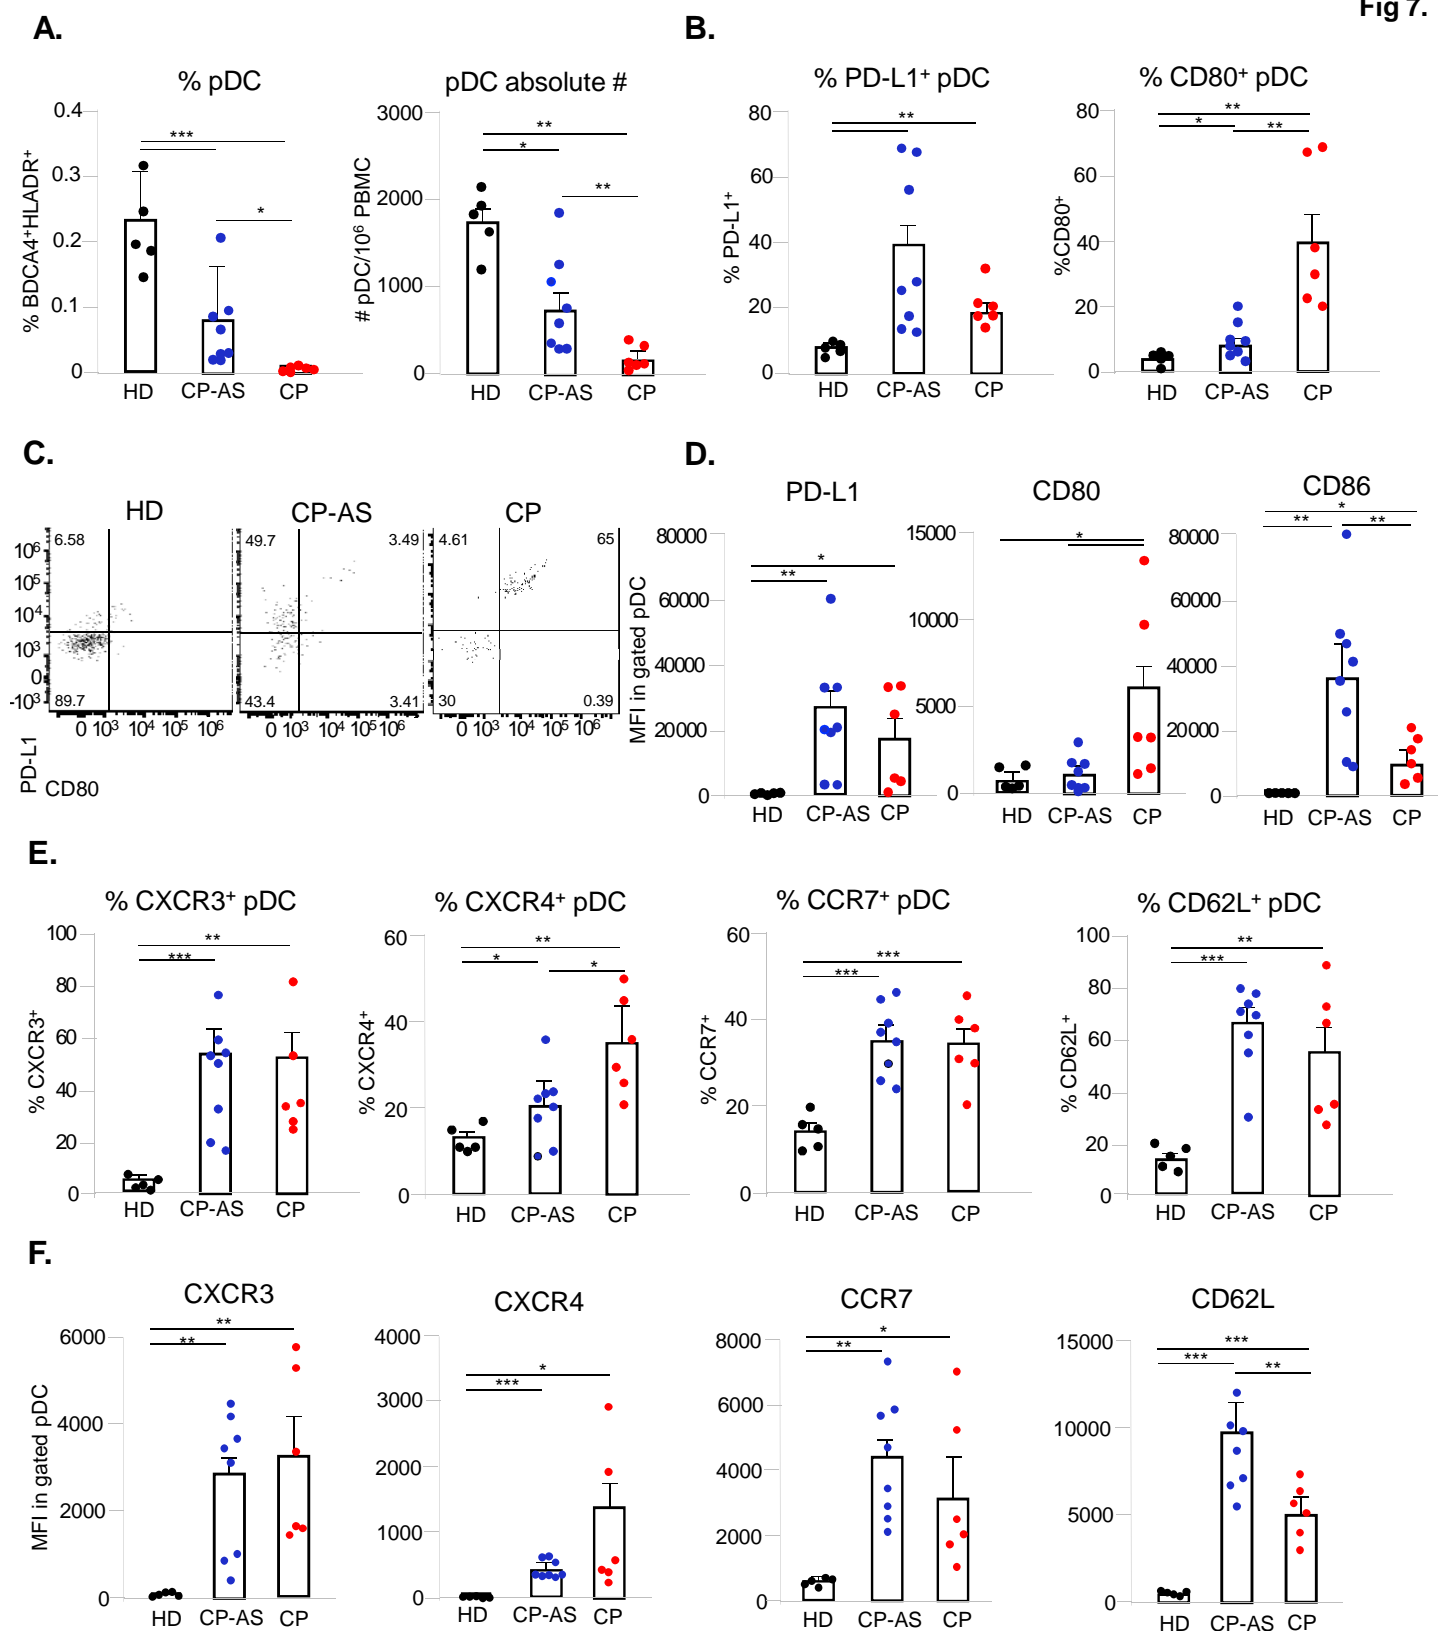

Fig 8.

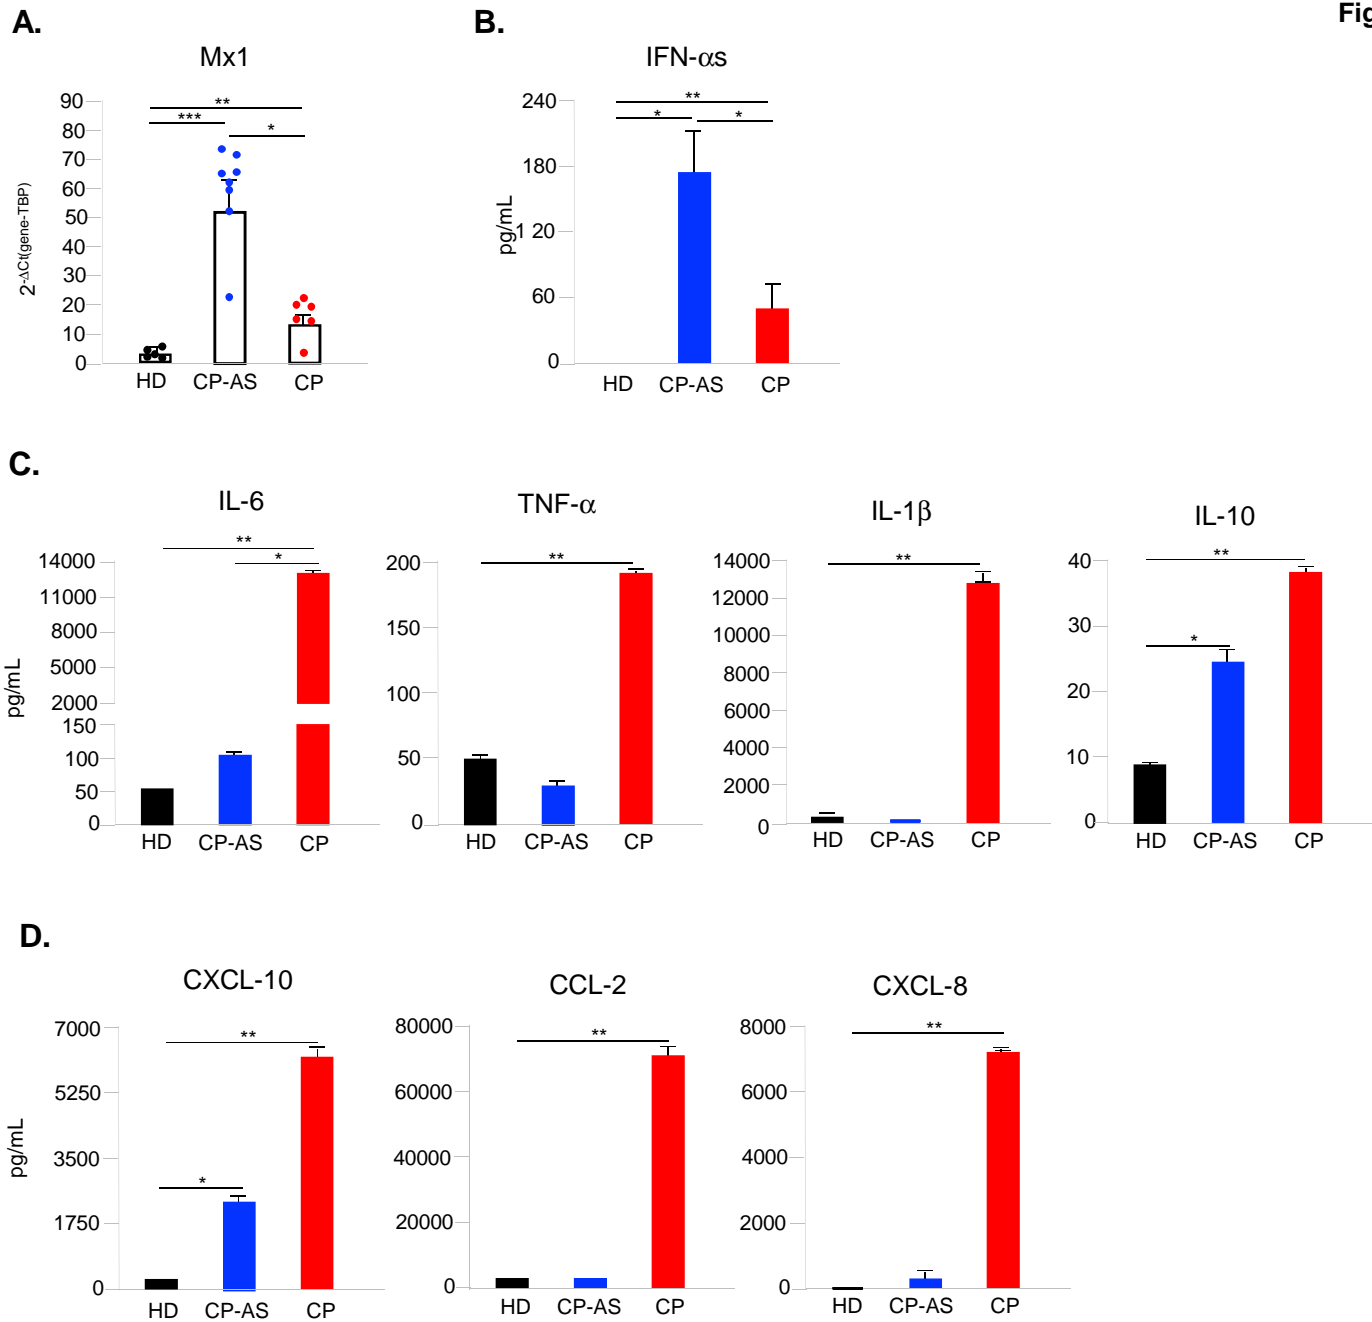

Source: https://www.biorxiv.org/content/10.1101/2021.04.17.440278v1.full.pdf
